1 Type: Research Article

2

3 Title of the manuscript: Molecular characterization and functional annotation of a  
4 hypothetical protein (TDB29877.1) from probiotic bacteria *Lactobacillus acidophilus*: an *in-*  
5 *silico* approach

6

7 Md Ataul Goni Rabbani\*

8

9

10 Poultry Production Research Division, Bangladesh Livestock Research Institute (BLRI),  
11 Savar, Dhaka, Bangladesh

12

13

14 \*Corresponding author

15 E-mail: [magrabbani@blri.gov.bd](mailto:magrabbani@blri.gov.bd) (MAGR)

16

17 Short Title: *In-silico* characterization of hypothetical protein *L. acidophilus*

## 18 **Abstract**

19 *Lactobacillus acidophilus* bacteria are widely used as probiotic and to produce  
20 various healthy fermented food products. The PNW3 strain of the bacteria has numerous  
21 proteins in its genome and some are considered as hypothetical proteins. The aim of the  
22 present study was to predict the structures and biological functions of the hypothetical protein  
23 (accession number: TDB29877.1) from *L. acidophilus* through an *in-silico* approach applying  
24 various bioinformatics tools. The sequence similarity was searched on the available  
25 biological databases using BLASTp program to find out the homologues proteins. Besides,  
26 determination of various properties like physicochemical characteristics, subcellular  
27 localization, phylogenetic analysis, functional annotation, protein-protein interaction,  
28 determination of secondary and tertiary structures, active site detection and further quality  
29 assessment analysis were done using appropriate computational methods of bioinformatics.  
30 *In-silico* analysis revealed that the hypothetical protein has contained TerB-N and TerB-C  
31 domains with the presence of YjbR-like superfamily. The Protein-protein interaction network  
32 analysis revealed that the protein highly interacted with various known and unknown proteins  
33 responsible for iron ion binding, DNA and RNA metabolisms and numerous repair  
34 mechanisms that maintain cellular integrity. It was also found that the protein has  
35 predominantly alpha-helices in its secondary structure and the three dimensional model has  
36 been found to be novel as it possessed expected quality while gone through various quality  
37 assessment tools. Thus, the present result indicated that the selected hypothetical protein  
38 which is cytoplasmic in nature with Belta-grasp fold, plays important role in responding  
39 during stress condition or phage defense mechanism.

### 40 **Key-words:**

41 *Lactobacillus acidophilus*, stress-response, probiotic, functional annotation, energy  
42 minimization, defense mechanism

## 43 Introduction

44 *Lactobacillus acidophilus* bacteria are widely used as probiotic for commercial use in  
45 the livestock sector especially in poultry feed as additive for the improvement of production  
46 performance [1–6]. In addition to produce various healthy food products like yogurt, cheese,  
47 and other dairy products [7,8]. Anyway, probiotics are the direct fed micro-organisms which  
48 when administered in adequate amounts confer a health benefit on the host and by improving  
49 its intestinal microbial balance [9–11]. These beneficial properties of *L. acidophilus* bacteria  
50 has aroused interest of the researchers across the globe to investigate the function of different  
51 proteins involved in defending mechanism.

52 Advancement in computational biology, development of various bioinformatics tools and  
53 analysis servers make it easier to predict functions of the protein, identify sequence  
54 similarity, conduct phylogenetic analysis, evaluate active site residue similarity, protein–  
55 protein interaction, conserved domains, motif phosphorylation regions and so on [12–17]. In  
56 most of the completely sequenced genomes, almost 60% genes have known functions. The  
57 number of genes having unknown functions called hypothetical proteins [18] which can be  
58 classified as either uncharacterized protein families or domain of unknown functions [19].  
59 Besides, with the advancement in sequencing technologies, the number of sequences  
60 deposited in the public biological databases like Swiss-Prot or GenBank have been increasing  
61 day by day [20,21] in comparison to experimentally determined structures deposited in the  
62 Protein Data Bank (PDB) [22]. This is resulting a gap between the number of known  
63 sequences and confirmed functions. The *in-silico* approaches can minimize the gap predicting  
64 structures and biological functions of the proteins [23]. The development of various  
65 bioinformatics tools come as a boon in this regard [24] which may also help in designing  
66 potential drug against pathogenic organisms and confer efficient pharmacological targets  
67 [25,26].

68 The annotation report from NCBI-Genome (<http://www.ncbi.nlm.nih.gov/genome/>) stated  
69 that the *Lactobacillus* bacteria have over 50 species. The PNW3 strain of *L. acidophilus* is  
70 gram-positive and has a total of 1776 proteins of which 255 proteins are uncharacterized and  
71 termed as hypothetical proteins. As the structures and biological functions of these  
72 hypothetical proteins are yet to know, molecular characterization and functional annotation  
73 of such proteins can lead the relevant researchers to a new dimension of knowledge about the  
74 structures, pathways, functions and potential uses in different areas of science. Tremendous  
75 development of *in-silico* analysis, numerous bioinformatics tools make it easier to analyze  
76 functional annotation of those hypothetical proteins. Thus, the present study was designed to  
77 reveal molecular characterization and functional annotation of a hypothetical protein  
78 (accession number: TDB29877.1) of the important probiotic bacteria *L. acidophilus* for better  
79 understanding of the protein applying various bioinformatics tools.

## 80 **Materials and methods**

### 81 **Retrieval of hypothetical protein sequence**

82 The sequence information of the hypothetical protein from *L. acidophilus* organism  
83 (TDB29877.1) was retrieved from the NCBI-Protein database [8]. Then, the sequence was  
84 stored as a FASTA format sequence for further use.

### 85 **Physicochemical properties analysis**

86 The physicochemical properties of the uncharacterized protein were obtained using the  
87 PortParam tool of the ExPaSy server [27]. Various parameters like the molecular weight,  
88 amino acid composition, atomic composition, estimated half-life, theoretical pI, extinction  
89 coefficient, instability index, aliphatic index, grand average of hydropathicity (GRAVY) etc  
90 were analyzed using the tool.

### 91 **Homology identification**

92 Similarity search for finding homologous proteins from related organisms that might have  
93 structural similarities with the selected hypothetical protein was carried out using BLASTp  
94 program of NCBI against non-redundant protein sequences and UniProt databases [28–30].

### 95 **Multiple sequence alignment and phylogeny analysis**

96 Multiple sequence alignment (MSA) was done by MUSCLE using MEGA software [31]  
97 between the selected hypothetical protein and other proteins obtained from BLASTp program  
98 of NCBI. MSA was also cross-checked by Clustal Omega program of EMBL-EBI [32]. Then,  
99 Phylogeny.fr tool [33] was used for the phylogeny analysis of the selected protein sequences.

### 100 **Subcellular localization analysis**

101 The subcellular localization of the selected hypothetical protein was predicted by using  
102 CELLO server [34]. PSORTb [35] and SOSUI tool [36] were also used for the verification of  
103 the subcellular localization. In addition, TMHMM, HMMTOP and CCTOP tools [37–39]  
104 were also used to cross-check the results.

### 105 **Functional annotation analysis**

106 For the purpose of functional annotation analysis of the selected hypothetical protein, search  
107 carried out at Conserved Domain Database (CDD) of NCBI for conserved domain(s) [40,41].  
108 Motif search were carried out using Motif server [42] and ScanProsite tool of ExPASy server  
109 [43]. Pfam [44] and Superfamily [45] database searches were also done to assign the  
110 protein's evolutionary relationships. InterProScan [46] was employed for the functional  
111 analysis of the protein. For protein folding pattern recognition, PFP-FunD SeqE tool [47] was  
112 used. Detection of coiled-coil conformation within the protein was performed using COILS  
113 server [48].

### 114 **Protein-protein interaction analysis**

115 Protein residues interact with each other for their accurate functions. STRING database [49],  
116 known for the prediction of protein-protein interactions, search was performed to identify the

117 possible functional interaction networks of the selected hypothetical protein of *L. acidophilus*  
118 bacteria (TDB29877.1).

### 119 **Secondary structure prediction**

120 The retrieved protein sequence was used for the prediction of the secondary structure of the  
121 hypothetical protein. SOMPA server [50,51] was used in this regard. The secondary structure  
122 prediction was also further cross-checked and validated by SABLE [52] and PSIPRED  
123 servers [53].

### 124 **Three-dimensional (3D) prediction**

125 The three-dimensional (3D) structure prediction of the hypothetical protein was performed  
126 using HHpred server [54,55] of the Max Planck Institute for Development Biology, Tubigen  
127 based on pairwise comparison profile of Hidden Markov Models (HMMs). Visualization of  
128 the 3D structure obtained from the HHpred server was then done by PyMOL program [56].  
129 SWISS-MODEL interactive workspace [57] was also further used to verify the prediction of  
130 3D structure of hypothetical protein by automated comparative modeling. Later, the 3D  
131 structure was further refined through YASARA energy minimization server [58] and  
132 YASARA view software.

### 133 **Quality assessment of the model**

134 Several assessment tools were used for the quality assessment of the predicted 3D structure of  
135 the hypothetical protein. PROCHECK, VERIFY3D and ERRAT tools of SAVES server [59–  
136 61] were used for the quality assessment of the build model.

### 137 **Active site detection**

138 Determination of active site of the hypothetical protein was done using Computer Atlas of  
139 Surface Topography of Protein (CASTp) server [62,63] which provides an online resource  
140 for locating, delineating and measuring concave surface regions on three-dimensional  
141 structures of proteins.

## 142 Results

### 143 Retrieval of hypothetical protein sequence

144 The selected a hypothetical protein (TDB29877.1) from *L. acidophilus* is a gram positive  
145 bacteria. It contains 606 amino acid residues. Additional information collected from the  
146 NCBI database regarding this hypothetical protein is given in Table 1.

147 **Table 1. Primary information of the selected hypothetical protein**

| Protein individualities     | Hypothetical protein information                                      |
|-----------------------------|-----------------------------------------------------------------------|
| Locus                       | TDB29877                                                              |
| Definition                  | hypothetical protein E1P27_08605 [ <i>Lactobacillus acidophilus</i> ] |
| Accession number            | TDB29877                                                              |
| Version                     | TDB29877.1                                                            |
| Organism                    | <i>Lactobacillus acidophilus</i>                                      |
| Source strain               | PNW3                                                                  |
| Host                        | <i>Sus scrofa domesticus</i>                                          |
| Country and collection time | South Africa: Pretoria; Jun-2012                                      |

### 148 Physicochemical properties analysis

149 The PortParam tool of the ExPaSy server was used to retrieve the physicochemical properties  
150 of the uncharacterized protein. The most abundant amino acid residue observed was lysine  
151 (9.7%), followed by leusine (9.6%), aspartic acid (8.6%), glutamine (7.8%) and isoleucine  
152 (7.3%). The lowest number of amino acids were cysteine (0.3%), tryptophan (1.2) and  
153 histidine (1.5%). Other physicochemical properties of the protein are given in Table 2.

154 **Table 2. Physicochemical properties of the hypothetical protein**

| Properties                                            | Value                                                                                 |
|-------------------------------------------------------|---------------------------------------------------------------------------------------|
| Molecular Formula                                     | C <sub>3274</sub> H <sub>5024</sub> N <sub>838</sub> O <sub>961</sub> S <sub>12</sub> |
| Molecular weight                                      | 71885.66                                                                              |
| Theoretical pI                                        | 5.59                                                                                  |
| Total number of negatively charged residues (Asp+Glu) | 99                                                                                    |
| Total number of positively charged residues (Arg+Lys) | 88                                                                                    |
| Instability index                                     | 38.21                                                                                 |
| Aliphatic index                                       | 84.80                                                                                 |
| Grand average of hydropathicity (GRAVY)               | -0.636                                                                                |

155

## 156 Homology identification

157 BLASTp program was used against non-redundant protein sequences and UniProt databases  
 158 to find out the homologous proteins with having structural similarities to the selected  
 159 hypothetical protein. The result of BLASTp program were given in Tables 3 and 4.

160 **Table 3. Similar proteins obtained from non-redundant protein sequences (nr) database**

| Accession No   | Organism                         | Protein name                              | Score | Ident. % | E-value |
|----------------|----------------------------------|-------------------------------------------|-------|----------|---------|
| WP_003546145.1 | <i>Lactobacillus acidophilus</i> | TerB N-terminal domain-containing protein | 1238  | 100      | 0       |
| WP_170089063.1 | <i>Lactobacillus amylovorus</i>  | TerB N-terminal domain-containing protein | 801   | 64.76    | 0       |
| WP_052542817.1 | <i>Lactobacillus sp. OTU4228</i> | TerB N-terminal domain-containing protein | 796   | 64.27    | 0       |
| WP_202017233.1 | <i>Lactobacillus kitasatonis</i> | TerB N-terminal domain-containing protein | 790   | 64.05    | 0       |
| WP_007125014.1 | <i>Lactobacillus ultunensis</i>  | TerB N-terminal domain-                   | 774   | 63.39    | 0       |



|                |                                   |                                                         |     |       |   |
|----------------|-----------------------------------|---------------------------------------------------------|-----|-------|---|
|                |                                   | containing protein                                      |     |       |   |
| WP_098044344.1 | <i>unclassified Lactobacillus</i> | MULTISPECIES: TerB N-terminal domain-containing protein | 759 | 61.83 | 0 |
| WP_060462377.1 | <i>Lactobacillus crispatus</i>    | TerB N-terminal domain-containing protein               | 759 | 59.87 | 0 |
| WP_204781356.1 | <i>Lactobacillus gallinarum</i>   | TerB N-terminal domain-containing protein               | 757 | 61.79 | 0 |

161

**Table 4. Similar proteins obtained from UniProt database**

| Accession No     | Organism                                                     | Protein Name                                    | Score | Ident. % | E-value   |
|------------------|--------------------------------------------------------------|-------------------------------------------------|-------|----------|-----------|
| A0A4V3BIJ5_9LACO | <i>Lactobacillus crispatus</i>                               | TerB_N domain-containing protein                | 1,163 | 62.40    | 1.00E-152 |
| A0A0U5K922_LACDE | <i>Lactobacillus delbrueckii</i><br><i>subsp. Bulgaricus</i> | TerB-N/TerB-C domain                            | 739   | 32.30    | 1.60E-85  |
| A0A0R2D8P4_9LACO | <i>Lactobacillus taiwanensis</i> DSM 21401                   | TerB_N domain-containing protein                | 663   | 34.20    | 1.30E-76  |
| A0A1G6BEX5_9FIRM | <i>Ruminococcaceae</i><br><i>bacterium FB2012</i>            | TerB-C domain-containing protein                | 629   | 29.60    | 8.70E-70  |
| A0A1H9EUD7_9FIRM | <i>Butyrivibrio</i> sp. TB                                   | Predicted DNA-binding protein, MmcQ/YjBR family | 540   | 27.00    | 3.70E-56  |
| A0A315Y7B5_RUMFL | <i>Ruminococcus flavefaciens</i>                             | TerB-like protein                               | 523   | 29.40    | 1.60E-55  |
| A0A3D5MZF8_9FIRM | <i>Erysipelotrichaceae</i><br><i>bacterium</i>               | TerB_N domain-containing protein (Fragment)     | 492   | 27.10    | 8.20E-51  |
| A0A562SBM9_9SPIO | <i>Treponema putidum</i>                                     | TerB-like protein                               | 475   | 27.60    | 2.30E-48  |
| A0A2M8Z4U1_9FIRM | <i>Clostridium</i>                                           | TerB-like protein                               | 433   | 28.90    | 2.10E-42  |

|  |                           |  |  |  |  |
|--|---------------------------|--|--|--|--|
|  | <i>celerecrescens 18A</i> |  |  |  |  |
|--|---------------------------|--|--|--|--|

## 162 **Multiple sequence alignment and phylogeny analysis**

163 Sequences obtained from BLASTp program and the query sequence (TDB29877.1) were  
164 aligned by MUSCLE using MEGA software is shown in Fig 1. Multiple sequence alignment  
165 was also cross-checked by Clustal Omega program of EMBL-EBI (S1 File). For the  
166 confirmation of homology assessment between the proteins, down to the complex and subunit  
167 level, phylogenetic analysis was also carried out using Phylogeny.fr server. One click method  
168 was applied to construct the phylogenetic tree on the basis of BLASTp result and multiple  
169 sequence alignment which given the similar concept about the query protein (Fig 2).

170 **Fig 1. Multiple sequence alignment of different homologous proteins aligned by**  
171 **MUSCLE**

172 **Fig 2. Phylogenic tree with bootstrap confidence values of different proteins from**  
173 ***Lactobacillus* organism**

## 174 **Subcellular localization analysis**

175 CELLO server was used to identify the subcellular localization of the selected  
176 uncharacterized protein. It was found that it's a cytoplasmic protein. The result obtained from  
177 the other servers (PSORTb, SOSUI, TMHMM, HMMTOP and CCTOP) were also revealed  
178 the similar indication (Table 5).

179 **Table 5. Subcellular localization of the hypothetical protein**

| <b>Subcellular localization analysis</b> | <b>Result</b>                    |
|------------------------------------------|----------------------------------|
| CELLO 3.0                                | Cytoplasmic                      |
| PSORTb                                   | Cytoplasmic membrane             |
| SOSUI                                    | Soluble protein                  |
| TMHMM 2.0                                | No transmembrane helices present |

|        |                                  |
|--------|----------------------------------|
| HMMTOP | No transmembrane helices present |
| CCTOP  | Not transmembrane protein        |

## 180 **Functional annotation analysis**

181 The conserved domain search (CD-search) revealed that (shown in Fig 3) the selected  
182 hypothetical protein had two domains, TerB-N terminal domain (accession no: pfam 13208)  
183 and TerB-C domain (accession no: cl21414). The TerB-N domain is found N-terminal to  
184 TerB, and TerB-C containing proteins. TerB-C occurs in the C terminus of TerB in TerB-N  
185 containing proteins. Pfam server predicted the TerB N-terminal domain at 141-360 amino  
186 acid residues with an e-value 8.8e-47 and TerB-C domain at 467-599 amino acid residues  
187 with an e-value 3.2e-21. Motif and InterProScan servers also forecasted the same domains  
188 with at similar alignment position. However, ScanProsite tool of ExPasY server did not find  
189 any hit while searching for motif. Superfamily server revealed presence of YjBR-like  
190 superfamily. PFP-FunD SeqE tool predicted the fold type of the selected hypothetical protein  
191 as Beta-grasp. The x-axis of output graph from COILS server represented the position of the  
192 amino acid number in the protein (starting at the N-terminus) and the y-axis showed the  
193 coiled coil whereas 'window' refers to the width of the amino acid window that is scanned at  
194 one time.

195 **Fig 3. Functional annotation of the hypothetical protein: Fig 3(a) NCBI CD-search**  
196 **result; Fig 3(b) Search result in Pfam server; Fig 3(c) Result of COILS server: coil**  
197 **shows the heptads corresponding to the residue window 14 (green), 21 (blue) and 28**  
198 **(red)**

## 199 **Protein-protein interaction analysis**

200 STRING database was used to analyze the protein-protein interaction. The result obtained  
201 from the STRING server revealed that the query protein interacted with other functionally  
202 known and unknown or uncharacterized proteins (Fig 4). The selected hypothetical protein of

203 *L. acidophilus* organism (TDB29877.1) showed a high confidence interaction with LBA0469  
204 and LBA0470 protein (same score 0.979) followed by LBA0471 (score 0.845), LBA0466  
205 (score 0.550), LBA0110 (score 0.478), amtB (score 0.464), PspC (score 0.458) and LBA1740  
206 (score 0.418). Of them, there are one COG1201 Lhr-like helicases, one ammonium transport  
207 protein, one surface protein PspC and one putative membrane protein. One protein is from  
208 Cytochrome P450 71C1 and annotation of three proteins are not available yet.

209 **Fig 4. STRING network analysis of the hypothetical protein, indicates as LBA0468**

## 210 **Secondary structure prediction**

211 Prediction about the secondary structure of the hypothetical protein which includes  $\alpha$ -helices,  
212  $\beta$ -sheets, extended strands, turn and coils were obtained from the SOMPA, SABLE and  
213 PSIPRED servers (Fig 5). The result of predicted secondary structure of the hypothetical  
214 protein from SOMPA server showed that alpha-helices were most predominant (50%)  
215 followed by random coil (36.8%), extended strand (10.73%) and beta-turn (2.48%). Similar  
216 type of outputs were obtained while validating the secondary structure using SABLE and  
217 PSIPRED tools.

218 **Fig 5. Secondary structure of hypothetical protein predicted by-Fig 5(a) SOMPA server**  
219 **(The window width, similarity threshold and number of states were 17, 8 and 4**  
220 **respectively); Fig 5(b) SABLE server; Fig 5(c) PSIPRED server**

## 221 **Three-dimensional (3D) prediction**

222 Prediction of the three-dimensional (3D) structure of hypothetical protein was done by using  
223 HHpred server. This server predicted 3D structure of the protein (Fig 6) having 99.24%  
224 identity with the highest scoring template (PDB ID: 3H9X\_A). 3H9X\_A is a crystal structure  
225 of the PSPTO\_3016 protein from *Pseudomonas syringae* organism with four chains (Chain  
226 A, B, C and D). Further validation of the 3D structure prediction by SWISS-MODEL  
227 interactive workspace revealed that the oligo-state of the protein is a monomer [64]. The

228 crystallographic resolution of the template used to the model protein was 2.51Å by adopting  
229 the X-ray diffraction method [65]. Global quality estimate, local quality estimate, comparison  
230 of protein size residue and model template alignment were also explored from this server (Fig  
231 7). Later, the 3D structure was further modified by YASARA energy minimization server.  
232 The energy calculated before energy minimization was -10988.9 kJ/mol whereas it was  
233 reduced to -55991.2 kJ/mol after energy minimization. The initial score was -2.99 while the  
234 final score was -0.19 after energy minimization.

235 **Fig 6. Predicted 3D structure of the hypothetical protein**

236 **Fig 7. The assessment of 3D structure using SWISS-MODEL interactive workspace: Fig**  
237 **7(a) Global quality estimate; Fig 7(b) local quality estimate; Fig 7(c) comparison of the**  
238 **protein size residue**

## 239 **Quality assessment of the model**

240 Validation of 3D structure of the hypothetical protein was done through several quality  
241 assessment steps. Assessment of the 3D model was done by PROCHECK tool through  
242 Ramachandran plot analysis (Fig 8), where the distribution of  $\phi$  and  $\psi$  angle in the model  
243 within the limits were shown. This result also showed that residues in the most favored  
244 regions covered 92.4% (Table 6). Then, the structure again verified by VERIFY 3D and  
245 ERRAT tools and found 90.65% of the residues had average 3D-1D score  $\geq 0.2$  and overall  
246 quality factor was 72.72 respectively.

247 **Fig 8. Ramachandran plot for the 3D model of the hypothetical protein validated by**  
248 **PROCHECK program**

249 **Table 6. Ramachandran plot statistics of the hypothetical protein**

|                                                      |    |       |
|------------------------------------------------------|----|-------|
| Residues in the most favored resigns [A,B,L]         | 85 | 92.4% |
| Residues in the additional allowed resigns [a,b,l,p] | 4  | 4.3%  |

|                                                                                      |      |       |
|--------------------------------------------------------------------------------------|------|-------|
| Residues in the generously allowed regions [ $\sim$ a, $\sim$ b, $\sim$ l, $\sim$ p] | 2    | 2.2%  |
| Residues in the disallowed regions                                                   | 1    | 1.1%  |
|                                                                                      | ---- | ----- |
| Number of non-glycine and non-proline residues                                       | 92   | 100%  |
| Number of end-residues (excl. Gly and Pro)                                           | 2    |       |
| Number of glycine residues (shown in triangles)                                      | 7    |       |
| Number of proline residues                                                           | 6    |       |
|                                                                                      | ---- |       |
| Total number of residues                                                             | 107  |       |

## 250 **Active site detection**

251 Computer Atlas of Surface Topography of Protein (CASTp) server was used to determination  
252 the active sites with the amino acid residues of the hypothetical protein (Fig 9). The result  
253 from CASTp calculation revealed a total of 18 active pockets of the hypothetical protein. The  
254 best active site found in the areas (SA) with 126.75 and a volume (SA) of 78.13 amino acids.

255 **Fig 9. Active site detection of the hypothetical protein using CASTp: Fig 9(a) The red**  
256 **sphere indicates the active site of the protein; Fig 9(b) Sequence of active amino acid**  
257 **residues of the largest pocket**

## 258 **Discussion**

259 Since the *L. acidophilus* bacteria are well known for its beneficial properties and are  
260 being used as probiotics, a hypothetical protein from this organism have targeted to examine  
261 it's involvement in the defensive mechanism against pathogenic organisms. Thus, the amino  
262 acid sequence of the targeted hypothetical protein was retrieved for further investigation. The  
263 selected hypothetical protein had a total of 606 amino acids. The computed instability index  
264 (38.21) classifying the protein as stable one because instability index value below 40

265 indicates a protein as stable and above 40 indicates as unstable [66]. The selected protein's  
266 aliphatic index (94.34) indicated its stability over a wide range of temperature and the  
267 negative GRAVY value (-0.636) indicated the hydrophilicity nature of the hypothetical  
268 protein [67].

269 Homology analysis revealed that the query protein has structural similarities with other TerB-  
270 N and TerB-C domain containing proteins from various *Lactobacillus* species. Multiple  
271 sequence alignment using MUSCLE and Clustal Omega program produced alignments  
272 between the selected sequences from BLASTp using seeded guide trees and HMM profile-  
273 profile techniques. The phylogenetic tree displayed the highest degree of similarity between  
274 the studied hypothetical protein and its related proteins for homology modeling obtained by  
275 BLASTp of NCBI. The bootstrapping confidence levels of the analysis stated the closed  
276 similarity between the query protein (TDB29877.1) and TerB N-terminal domain-containing  
277 protein (WP\_003546145.1) of *L. acidophilus* organism. Other homologous proteins from  
278 various *Lactobacillus* species formed separate clades having varied structural similarity with  
279 the studied hypothetical protein.

280 Basically, subcellular localization of protein indicates where the protein resides in a cell; it  
281 may be in outer membrane, inner membrane, periplasm, extracellular or in cytoplasm [68].  
282 The functional properties, interaction and genome annotation are highly influenced by its  
283 subcellular localization. Results from CELLO and PSORTb servers indicated the  
284 hypothetical protein as a cytoplasmic one. SOSUI server was also depicted the selected  
285 protein as a soluble protein. Absent of transmembrane helices predicted by TMHMM and  
286 HMMTOP also emphasized the result of being cytoplasmic protein. In addition, CCTOP  
287 server also summarized that the query protein was not a transmembrane protein, thus its a  
288 cytoplasmic protein. Such subcellular identification analysis indicated that the hypothetical  
289 protein might be involved in recovering disease state through discovering some novel drugs

290 [69]. As the membrane protein can be used as a potential vaccine target and the cytoplasmic  
291 proteins may act as promising drug targets [70], the selected hypothetical protein may be a  
292 good source for producing various beneficial pharmaceutical products or healthy food items.  
293 The response against chemical stress and anti-viral defense systems of bacteria are  
294 constituted by the Ter gene products. The TerB\_N has a predominantly alpha-helical  
295 structure and contains an absolutely conserved glutamate. The presence of a conserved acidic  
296 residue suggested that it might chelate metal like TerB. These proteins occur in a two-gene  
297 operon containing an AAA+ ATPase and SF-II DNA helicase suggesting a role in stress-  
298 response or phage defense [71]. TerB-C domain also displays multiple conserved acidic  
299 residues. The presence of conserved acidic residues in both TerB-N and TerB-C suggested  
300 that they, like the TerB domain, might also chelate metals. These two domains might also  
301 occur together in the same protein independently of TerB [71]. Motif, Pfam and InterProScan  
302 servers also confirmed the presence of TerB-N and TerB-C domains in the selected  
303 hypothetical protein. YjbR-like superfamily of the hypothetical protein is expected to contain  
304 the DNA binding domain comprising the 'double wing' motif [72]. Moreover, protein fold  
305 plays a significant role in their function and hence the fold prediction has also been applied in  
306 order to further validate the predicted function. PFP-FunD SeqE tool revealed the fold type of  
307 the hypothetical protein as 'Belta-grasp' which indicated that the protein might play role in  
308 hydrolase activity [73].  
309 The function of a target protein and drug availability of molecules can be predicted by  
310 analyzing protein-protein interaction [49]. Protein-protein interaction network analysis  
311 showed that the query protein (TDB29877.1, shown as LBA0468 in Fig 4) highly interacted  
312 with proteins LBA0469, LBA0470 and LBA0471 within the network; they are also  
313 neighborhood in the genome. These interactions give an indication about the selected



314 hypothetical protein that it might be involved in iron ion binding, DNA and RNA  
315 metabolisms and numerous repair mechanisms that maintain cellular integrity [29,74].  
316 It was obtained from SOMPA saver prediction that the selected secondary structure of  
317 hypothetical protein was an alpha-helices dominating protein. The window width, similarity  
318 threshold and number of states were 17, 8 and 4 respectively. Confidence of prediction from  
319 PSIPRED server also stated alpha-helices dominating output. In addition, SABLE server  
320 forecasted the secondary structure of the protein having a good confidence of prediction.  
321 The HHpred server forecasted a 3H9X\_A protein template with highest score (106.27). 3H9X  
322 belongs to the protein Pspto\_3016 of *Pseudomonas syringae*. Pspto\_3016 is a 117-residue  
323 member of the protein domain family PF04237, which is to date a functionally  
324 uncharacterized family of proteins [75]. The GMQE (Global Model Quality Estimation) and  
325 QMEAN value of the selected model from the SWISS-MODEL interactive workspace  
326 analysis were 0.06 and -1.69 respectively [57]. GMQE is a quality estimation which  
327 combines properties from the target–template alignment and the template structure and the  
328 resulting GMQE score is expressed as a number between 0 and 1. The QMEAN Z-score  
329 provides an estimate of the ‘degree of nativeness’ of the structural features observed in the  
330 model on a global scale [76,77] and scores of -4.0 or below are an indication of models with  
331 low quality. The GMQE and QMEAN score of the selected model indicated it as a  
332 comparatively reliable and better quality model. The comparison plot and model quality  
333 scores of individual models are related to scores obtained for experimental structures of  
334 similar size. The x-axis shows protein length (number of residues). The y-axis is the  
335 normalized QMEAN score. Every dot represents one experimental protein structure. Black  
336 dots are experimental structures with a normalized QMEAN score within 1 standard  
337 deviation of the mean ( $|Z\text{-score}|$  between 0 and 1), experimental structures with a  $|Z\text{-score}|$   
338 between 1 and 2 are grey. Experimental structure that are even further from the mean are

339 light grey [76,77]. The actual model is represented as a red star meant that our model was  
340 within the grey region. In addition, reduced energy and improved score of the predicted  
341 model applying YASARA energy minimization tools indicated the model structure as more  
342 stable one [58].

343 Ramachandran plot analysis showed that 92.4% of the residues belonged to the most favored  
344 regions. Residues in additional allowed regions and generously allowed regions were 4.3%  
345 and 2.2% respectively, which indicated reliability of the model quality. It is generally  
346 accepted that more than 90% of the residues in the most favored regions is likely to be a  
347 reliable 3D model [78]. The environmental profile or the amino acid environment for non-  
348 bonded atomic interactions of the model is good as VERIFY 3D analysis revealed that  
349 90.65% of the residues had average 3D-1D score  $\geq 0.2$ . Overall quality factor obtained  
350 through ERRAT was 72.72 which indicated a high quality model. Higher scores indicate  
351 higher quality and the generally accepted range is  $>50$  for a high quality model [79].

352 A probe radius of 1.4Å was used for computing solvent accessible surface area while  
353 calculating the active sites of the hypothetical protein using CASTp server. It also measured  
354 the exact volumes and areas, as well as sizes of the mouth openings of the active pockets.  
355 These metrics were calculated analytically, using both the solvent accessible surface model  
356 called Lee and Richards' surface model [80] and the molecular surface model called  
357 Connolly's surface model [81].

## 358 **Conclusion**

359 The current study was designed to forecast the structures and biological functions of a  
360 hypothetical protein (TDB29877.1) from *L. acidophilus* bacteria through an *in-silico*  
361 approach. All the above findings applying various bioinformatics tools suggested that the  
362 selected hypothetical protein from probiotic type bacteria plays role in responding during  
363 stress condition or phage defense mechanism. It was also found that the hypothetical protein

364 of interest is cytoplasmic in nature containing ‘Belta-grasp’ fold. These findings may  
365 encourage researchers who are interested to work with such beneficial probiotic bacteria to  
366 produce various feed additives or healthy food products. Therefore, the outcome of this study  
367 in determining structures and functions of the uncharacterized protein indicate reliability of  
368 computational approach using bioinformatics tools, thereby assisting experimental validation  
369 research on a protein.

## 370 **Acknowledgement**

371 The author is grateful to Mr Mohammad Uzzal Hossain of Bioinformatics Division at  
372 National Institute of Biotechnology, Bangladesh for providing extraordinary mental support,  
373 guidelines and courage to work on such topic.

## 374 **References**

- 375 1. Gallazzi D, Giardini A, Mangiagalli MG, Marelli S, Ferrazzi V, Orsi C, et al. Effects  
376 of *Lactobacillus acidophilus* D2/CSL on laying hen performance. *Ital J Anim Sci.*  
377 2008;7: 27–37. doi:10.4081/ijas.2008.27
- 378 2. Salarmoini M, Fooladi MH. Efficacy of *Lactobacillus acidophilus* as probiotic to  
379 improve broiler chicks performance. *J Agric Sci Technol.* 2011;13: 165–172.
- 380 3. De Cesare A, Sirri F, Manfreda G, Moniaci P, Giardini A, Zampiga M, et al. Effect of  
381 dietary supplementation with *Lactobacillus acidophilus* D2/CSL (CECT 4529) on  
382 caecum microbioma and productive performance in broiler chickens. *PLoS One.*  
383 2017;12. doi:10.1371/journal.pone.0176309
- 384 4. Balevi T, An USU, Coskun B, Kurtoglu V, Etingül IS. Effect of dietary probiotic on  
385 performance and humoral immune response. *Br Poult Sci.* 2001;42: 456–461.  
386 doi:10.1080/00071660120073133
- 387 5. Kurtoglu V, Kurtoglu F, Seker E, Coskun B, Balevi T, Polat ES. Effect of probiotic

- 388 supplementation on laying hen diets on yield performance and serum and egg yolk  
389 cholesterol. Food Addit Contam. 2004;21: 817–823.  
390 doi:10.1080/02652030310001639530
- 391 6. Ljungh Å, Wadström T. Lactic acid bacteria as probiotics. Curr Issues Intest  
392 Microbiol. 2001;7: 73–90.
- 393 7. Ershidat OTM, Mazahreh AS. Probiotics bacteria in fermented dairy products.  
394 Pakistan J Nutr. 2009;8: 1107–1113. doi:10.3923/pjn.2009.1107.1113
- 395 8. NCBI. *Lactobacillus acidophilus* (ID 1099) - Genome - NCBI. [cited 22 May 2021].  
396 Available: <https://www.ncbi.nlm.nih.gov/genome/?term=Lactobacillus+acidophilus>
- 397 9. AFRC RF. Probiotics in man and animals. Journal of Applied Bacteriology. John  
398 Wiley & Sons, Ltd; 1989. pp. 365–378. doi:10.1111/j.1365-2672.1989.tb05105.x
- 399 10. Miles RD, Bootwalla SM. Direct-fed microbials in animal production. A Rev. 1991;  
400 117–132.
- 401 11. FAO. Report of a joint FAO/WHO expert consultation on evaluation of health and  
402 nutritional properties of probiotics in food including powder milk with live lactic acid  
403 bacteria. Amerian Córdoba Park Hotel, Córdoba, Argentina; 2001.
- 404 12. Díaz DA, Barreto GE, Santos JG. Structural and functional prediction of the  
405 hypothetical protein PA2481 in *Pseudomonas aeruginosa* Paol. Advances in  
406 Intelligent Systems and Computing. Springer Verlag; 2014. pp. 47–55.  
407 doi:10.1007/978-3-319-01568-2\_7
- 408 13. Canduri F, Fadel V, Basso LA, Palma MS, Santos DS, De Azevedo WF. New catalytic  
409 mechanism for human purine nucleoside phosphorylase. Biochem Biophys Res  
410 Commun. 2005;327: 646–649. doi:10.1016/j.bbrc.2004.12.052
- 411 14. Henrique Pereira J, Canduri F, Sim J, de Oliveira oes, Jos Freitas da Silveira N,  
412 Augusto Basso L, et al. Structural bioinformatics study of EPSP synthase from

- 413 Mycobacterium tuberculosis. doi:10.1016/j.bbrc.2003.10.175
- 414 15. Canduri F, Cardoso Perez P, Caceres R, de Azevedo W. Protein kinases as targets for  
415 antiparasitic chemotherapy drugs. *Curr Drug Targets*. 2007;8: 389–398.  
416 doi:10.2174/138945007780058979
- 417 16. Gong J, Chen Y, Pu F, Sun P, He F, Zhang L, et al. Understanding membrane protein  
418 drug targets in computational perspective. *Curr Drug Targets*. 2019;20: 551–564.  
419 doi:10.2174/1389450120666181204164721
- 420 17. Tan J-X, Lv H, Wang F, Dao F-Y, Chen W, Ding H. A survey for predicting enzyme  
421 family classes using machine learning methods. *Curr Drug Targets*. 2019;20: 540–550.  
422 doi:10.2174/1389450119666181002143355
- 423 18. Naveed M, Tehreem S, Usman M, Chaudhry Z, Abbas G. Structural and functional  
424 annotation of hypothetical proteins of human adenovirus: prioritizing the novel drug  
425 targets. *BMC Res Notes*. 2017;10: 706. doi:10.1186/s13104-017-2992-z
- 426 19. Jaroszewski L, Li Z, Krishna SS, Bakolitsa C, Wooley J, Deacon AM, et al.  
427 Exploration of uncharted regions of the protein universe. *PLoS Biol*. 2009;7:  
428 e1000205. doi:10.1371/journal.pbio.1000205
- 429 20. Boeckmann B, Bairoch A, Apweiler R, Blatter MC, Estreicher A, Gasteiger E, et al.  
430 The SWISS-PROT protein knowledgebase and its supplement TrEMBL in 2003.  
431 *Nucleic Acids Research*. *Nucleic Acids Res*; 2003. pp. 365–370.  
432 doi:10.1093/nar/gkg095
- 433 21. Benson DA, Karsch-Mizrachi I, Lipman DJ, Ostell J, Rapp BA, Wheeler DL.  
434 GenBank. *Nucleic Acids Res*. 2002;30: 17–20. doi:10.1093/nar/30.1.17
- 435 22. Berman HM, Westbrook J, Feng Z, Gilliland G, Bhat TN, Weissig H, et al. The  
436 Protein Data Bank. *Nucleic Acids Research*. Oxford University Press; 2000. pp. 235–  
437 242. doi:10.1093/nar/28.1.235

- 438 23. Baker D, Sali A. Protein structure prediction and structural genomics. *Science*.  
439 *Science*; 2001. pp. 93–96. doi:10.1126/science.1065659
- 440 24. Doerks T, von Mering C, Bork P. Functional clues for hypothetical proteins based on  
441 genomic context analysis in prokaryotes. *Nucleic Acids Res*. 2004;32: 6321–6326.  
442 doi:10.1093/nar/gkh973
- 443 25. F. de Azevedo W. Molecular Dynamics Simulations of Protein Targets Identified in  
444 *Mycobacterium tuberculosis*. *Curr Med Chem*. 2011;18: 1353–1366.  
445 doi:10.2174/092986711795029519
- 446 26. De Azevedo WF, Canduri F, Fadel V, Teodoro LGVL, Hial V, Gomes RAS.  
447 Molecular model for the binary complex of uropepsin and pepstatin. *Biochem Biophys*  
448 *Res Commun*. 2001;287: 277–281. doi:10.1006/bbrc.2001.5555
- 449 27. Gasteiger E, Hoogland C, Gattiker A, Duvaud S, Wilkins MR, Appel RD, et al. Protein  
450 identification and analysis tools on the ExPASy server. *The Proteomics Protocols*  
451 *Handbook*. Humana Press; 2005. pp. 571–607. doi:10.1385/1-59259-890-0:571
- 452 28. Altschul SF, Gish W, Miller W, Myers EW, Lipman DJ. Basic local alignment search  
453 tool. *J Mol Biol*. 1990;215: 403–410. doi:10.1016/S0022-2836(05)80360-2
- 454 29. Bateman A. UniProt: A worldwide hub of protein knowledge. *Nucleic Acids Res*.  
455 2019;47: D506–D515. doi:10.1093/nar/gky1049
- 456 30. Bateman A, Martin MJ, Orchard S, Magrane M, Agivetova R, Ahmad S, et al.  
457 UniProt: The universal protein knowledgebase in 2021. *Nucleic Acids Res*. 2021;49:  
458 D480–D489. doi:10.1093/nar/gkaa1100
- 459 31. Tamura K, Stecher G, Kumar S. MEGA11: Molecular Evolutionary Genetics Analysis  
460 version 11. Battistuzzi FU, editor. *Mol Biol Evol*. 2021 [cited 22 May 2021].  
461 doi:10.1093/molbev/msab120
- 462 32. Madeira F, Park YM, Lee J, Buso N, Gur T, Madhusoodanan N, et al. The EMBL-EBI

- 463 search and sequence analysis tools APIs in 2019. *Nucleic Acids Res.* 2019;47: W636–  
464 W641. doi:10.1093/nar/gkz268
- 465 33. Dereeper A, Guignon V, Blanc G, Audic S, Buffet S, Chevenet F, et al. Phylogeny.fr:  
466 robust phylogenetic analysis for the non-specialist. *Nucleic Acids Res.* 2008;36:  
467 W465–W469. doi:10.1093/nar/gkn180
- 468 34. Yu CS, Chen YC, Lu CH, Hwang JK. Prediction of protein subcellular localization.  
469 *Proteins Struct Funct Genet.* 2006;64: 643–651. doi:10.1002/prot.21018
- 470 35. Yu NY, Wagner JR, Laird MR, Melli G, Rey S, Lo R, et al. PSORTb 3.0: Improved  
471 protein subcellular localization prediction with refined localization subcategories and  
472 predictive capabilities for all prokaryotes. *Bioinformatics.* 2010;26: 1608–1615.  
473 doi:10.1093/bioinformatics/btq249
- 474 36. Hirokawa T, Boon-Chieng S, Mitaku S. SOSUI: classification and secondary structure  
475 prediction system for membrane proteins. *Bioinformatics.* 1998;14: 378–379.  
476 doi:10.1093/bioinformatics/14.4.378
- 477 37. Möller S, Croning MDR, Apweiler R. Evaluation of methods for the prediction of  
478 membrane spanning regions. *Bioinformatics.* 2001;17: 646–653.  
479 doi:10.1093/bioinformatics/17.7.646
- 480 38. Tusnády GE, Simon I. The HMMTOP transmembrane topology prediction server.  
481 *Bioinformatics.* 2001;17: 849–850. doi:10.1093/bioinformatics/17.9.849
- 482 39. Dobson L, Reményi I, Tusnády GE. CCTOP: A Consensus Constrained TOPology  
483 prediction web server. *Nucleic Acids Res.* 2015;43: W408–W412.  
484 doi:10.1093/nar/gkv451
- 485 40. Lu S, Wang J, Chitsaz F, Derbyshire MK, Geer RC, Gonzales NR, et al.  
486 CDD/SPARCLE: The conserved domain database in 2020. *Nucleic Acids Res.*  
487 2020;48: D265–D268. doi:10.1093/nar/gkz991

- 488 41. Marchler-Bauer A, Bryant SH. CD-Search: Protein domain annotations on the fly.  
489 Nucleic Acids Res. 2004;32: W327–W331. doi:10.1093/nar/gkh454
- 490 42. Kanehisa M, Goto S, Kawashima S, Nakaya A. The KEGG databases at GenomeNet.  
491 Nucleic Acids Res. 2002;30: 42–46. doi:10.1093/nar/30.1.42
- 492 43. de Castro E, Sigrist CJA, Gattiker A, Bulliard V, Langendijk-Genevaux PS, Gasteiger  
493 E, et al. ScanProsite: Detection of PROSITE signature matches and ProRule-associated  
494 functional and structural residues in proteins. Nucleic Acids Res. 2006;34: W362–  
495 W365. doi:10.1093/nar/gkl124
- 496 44. Finn RD, Bateman A, Clements J, Coghill P, Eberhardt RY, Eddy SR, et al. Pfam: The  
497 protein families database. Nucleic Acids Res. 2014;42: D222–D230.  
498 doi:10.1093/nar/gkt1223
- 499 45. Wilson D, Madera M, Vogel C, Chothia C, Gough J. The SUPERFAMILY database in  
500 2007: Families and functions. Nucleic Acids Res. 2007;35: D308–D313.  
501 doi:10.1093/nar/gkl910
- 502 46. Hunter S, Apweiler R, Attwood TK, Bairoch A, Bateman A, Binns D, et al. InterPro:  
503 The integrative protein signature database. Nucleic Acids Res. 2009;37: D211–D215.  
504 doi:10.1093/nar/gkn785
- 505 47. Shen H Bin, Chou KC. Predicting protein fold pattern with functional domain and  
506 sequential evolution information. J Theor Biol. 2009;256: 441–446.  
507 doi:10.1016/j.jtbi.2008.10.007
- 508 48. Lupas A, Van Dyke M, Stock J. Predicting coiled coils from protein sequences.  
509 Science (80- ). 1991;252: 1162–1164. doi:10.1126/science.252.5009.1162
- 510 49. Szklarczyk D, Franceschini A, Wyder S, Forslund K, Heller D, Huerta-Cepas J, et al.  
511 STRING v10: Protein-protein interaction networks, integrated over the tree of life.  
512 Nucleic Acids Res. 2015;43: D447–D452. doi:10.1093/nar/gku1003



- 513 50. Geourjon C, Deléage G. SOMPA: Significant improvements in protein secondary  
514 structure prediction by consensus prediction from multiple alignments. *Bioinformatics*.  
515 1995;11: 681–684. doi:10.1093/bioinformatics/11.6.681
- 516 51. Combet C, Blanchet C, Geourjon C, Deléage G. NPS@: Network Protein Sequence  
517 analysis. *Trends Biochem Sci*. 2000;25: 147–150. doi:10.1016/S0968-0004(99)01540-  
518 6
- 519 52. Adamczak R, Porollo A, Meller J. Combining prediction of secondary structure and  
520 solvent accessibility in proteins. *Proteins Struct Funct Genet*. 2005;59: 467–475.  
521 doi:10.1002/prot.20441
- 522 53. McGuffin LJ, Bryson K, Jones DT. The PSIPRED protein structure prediction server.  
523 *Bioinformatics*. 2000;16: 404–405. doi:10.1093/bioinformatics/16.4.404
- 524 54. Zimmermann L, Stephens A, Nam SZ, Rau D, Kübler J, Lozajic M, et al. A  
525 completely reimplemented MPI Bioinformatics Toolkit with a new HHpred server at  
526 its core. *J Mol Biol*. 2018;430: 2237–2243. doi:10.1016/j.jmb.2017.12.007
- 527 55. Gabler F, Nam SZ, Till S, Mirdita M, Steinegger M, Söding J, et al. Protein sequence  
528 analysis using the MPI Bioinformatics Toolkit. *Curr Protoc Bioinforma*. 2020;72:  
529 e108. doi:10.1002/cpbi.108
- 530 56. PyMOL. The PyMOL Molecular Graphics System. Schrödinger, LLC; Available:  
531 <https://pymol.org/>
- 532 57. Waterhouse A, Bertoni M, Bienert S, Studer G, Tauriello G, Gumienny R, et al.  
533 SWISS-MODEL: Homology modelling of protein structures and complexes. *Nucleic*  
534 *Acids Res*. 2018;46: W296–W303. doi:10.1093/nar/gky427
- 535 58. Krieger E, Joo K, Lee J, Lee J, Raman S, Thompson J, et al. Improving physical  
536 realism, stereochemistry, and side-chain accuracy in homology modeling: Four  
537 approaches that performed well in CASP8. *Proteins: Structure, Function and*

- 538 Bioinformatics. Proteins; 2009. pp. 114–122. doi:10.1002/prot.22570
- 539 59. Laskowski RA, MacArthur MW, Moss DS, Thornton JM. PROCHECK: a program to  
540 check the stereochemical quality of protein structures. *J Appl Crystallogr.* 1993;26:  
541 283–291. doi:10.1107/s0021889892009944
- 542 60. Eisenberg D, Lüthy R, Bowie JU. VERIFY3D: Assessment of protein models with  
543 three-dimensional profiles. *Methods Enzymol.* 1997;277: 396–404.  
544 doi:10.1016/S0076-6879(97)77022-8
- 545 61. Colovos C, Yeates TO. Verification of protein structures: Patterns of nonbonded  
546 atomic interactions. *Protein Sci.* 1993;2: 1511–1519. doi:10.1002/pro.5560020916
- 547 62. Tian W, Chen C, Lei X, Zhao J, Liang J. CASTp 3.0: Computed atlas of surface  
548 topography of proteins. *Nucleic Acids Res.* 2018;46: W363–W367.  
549 doi:10.1093/nar/gky473
- 550 63. Dundas J, Ouyang Z, Tseng J, Binkowski A, Turpaz Y, Liang J. CASTp: Computed  
551 atlas of surface topography of proteins with structural and topographical mapping of  
552 functionally annotated residues. *Nucleic Acids Res.* 2006;34. doi:10.1093/nar/gkl282
- 553 64. Bertoni M, Kiefer F, Biasini M, Bordoli L, Schwede T. Modeling protein quaternary  
554 structure of homo- and hetero-oligomers beyond binary interactions by homology. *Sci*  
555 *Rep.* 2017;7: 1–15. doi:10.1038/s41598-017-09654-8
- 556 65. Hisano T, Tsuge T, Fukui T, Iwata T, Miki K, Doi Y. Crystal structure of the (R)-  
557 specific enoyl-CoA hydratase from *Aeromonas caviae* involved in  
558 polyhydroxyalkanoate biosynthesis. *J Biol Chem.* 2003;278: 617–624.  
559 doi:10.1074/jbc.M205484200
- 560 66. Guruprasad K, Reddy BVB, Pandit MW. Correlation between stability of a protein and  
561 its dipeptide composition: A novel approach for predicting in vivo stability of a protein  
562 from its primary sequence. *Protein Eng Des Sel.* 1990;4: 155–161.

- 563 doi:10.1093/protein/4.2.155
- 564 67. Kyte J, Doolittle RF. A simple method for displaying the hydropathic character of a  
565 protein. *J Mol Biol.* 1982;157: 105–132. doi:10.1016/0022-2836(82)90515-0
- 566 68. Huang GH, Xu WB. Recent advance in new types of human adenovirus. *Chinese J*  
567 *Virol.* 2013;29: 342–348. Available: <https://europepmc.org/article/med/23905481>
- 568 69. Imai K, Asakawa N, Tsuji T, Akazawa F, Ino A, Sonoyama M, et al. SOSUI-GramN:  
569 high performance prediction for sub-cellular localization of proteins in Gram-negative  
570 bacteria. *Bioinformatics.* 2008;2: 417–421. doi:10.6026/97320630002417
- 571 70. Vahisalu T, Kollist H, Wang YF, Nishimura N, Chan WY, Valerio G, et al. SLAC1 is  
572 required for plant guard cell S-type anion channel function in stomatal signalling.  
573 *Nature.* 2008;452: 487–491. doi:10.1038/nature06608
- 574 71. Anantharaman V, Iyer LM, Aravind L. Ter-dependent stress response systems: Novel  
575 pathways related to metal sensing, production of a nucleoside-like metabolite, and  
576 DNA-processing. *Mol Biosyst.* 2012;8: 3142–3165. doi:10.1039/c2mb25239b
- 577 72. Singarapu KK, Liu G, Xiao R, Bertonati C, Honig B, Montelione GT, et al. NMR  
578 structure of protein yjbr from *Escherichia coli* reveals “double-wing” DNA binding  
579 motif. *Proteins Struct Funct Genet.* 2007;67: 501–504. doi:10.1002/prot.21297
- 580 73. Kuhn P, Tarentino AL, Plummer TH, Van Roey P. Crystal Structure of Peptide-N4-  
581 (N-acetyl- $\beta$ -d-glucosaminyl)asparagine Amidase F at 2.2-Å Resolution. *Biochemistry.*  
582 1994;33: 11699–11706. doi:10.1021/bi00205a005
- 583 74. Hajj M, Langendijk-Genevaux P, Batista M, Quentin Y, Laurent S, Abdel Raz-zak Z,  
584 et al. Phylogenetic diversity of Lhr proteins and biochemical ac-tivities of the  
585 Thermococcales aLhr2 DNA/RNA helicase. 2021 [cited 23 May 2021].  
586 doi:10.20944/preprints202103.0477.v1
- 587 75. Feldmann EA, Seetharaman J, Ramelot TA, Lew S, Zhao L, Hamilton K, et al.

- 588 Solution NMR and X-ray crystal structures of *Pseudomonas syringae* Pspto-3016 from  
589 protein domain family PF04237 (DUF419) adopt a “double wing” DNA binding motif.  
590 *J Struct Funct Genomics*. 2012;13: 155–162. doi:10.1007/s10969-012-9140-8
- 591 76. Benkert P, Biasini M, Schwede T. Toward the estimation of the absolute quality of  
592 individual protein structure models. *Bioinformatics*. 2011;27: 343–350.  
593 doi:10.1093/bioinformatics/btq662
- 594 77. Studer G, Rempfer C, Waterhouse AM, Gumienny R, Haas J, Schwede T.  
595 QMEANDisCo—distance constraints applied on model quality estimation.  
596 *Bioinformatics*. 2020;36: 1765–1771. doi:10.1093/bioinformatics/btz828
- 597 78. Hooda V, Gundala P babu, Chinthala P. Sequence analysis and homology modeling of  
598 peroxidase from *Medicago sativa*. *Bioinformation*. 2012;8: 974–979.  
599 doi:10.6026/97320630008974
- 600 79. Messaoudi A, Belguith H, Hamida J Ben. Three-dimensional structure of *Arabidopsis*  
601 *thaliana* lipase predicted by homology modeling method. *Evol Bioinforma*. 2011;2011:  
602 99–105. doi:10.4137/EBO.S7122
- 603 80. Lee B, Richards FM. The interpretation of protein structures: Estimation of static  
604 accessibility. *J Mol Biol*. 1971;55: 379–400. doi:10.1016/0022-2836(71)90324-X
- 605 81. Connolly ML. Solvent-accessible surfaces of proteins and nucleic acids. *Science*.  
606 *Science*; 1983. pp. 709–713. doi:10.1126/science.6879170

## 607 **Supporting information**

- 608 **S1 File. Multiple sequence alignment of different homologous proteins aligned by**  
609 **Clustal Omega program of EMBL-EBI**

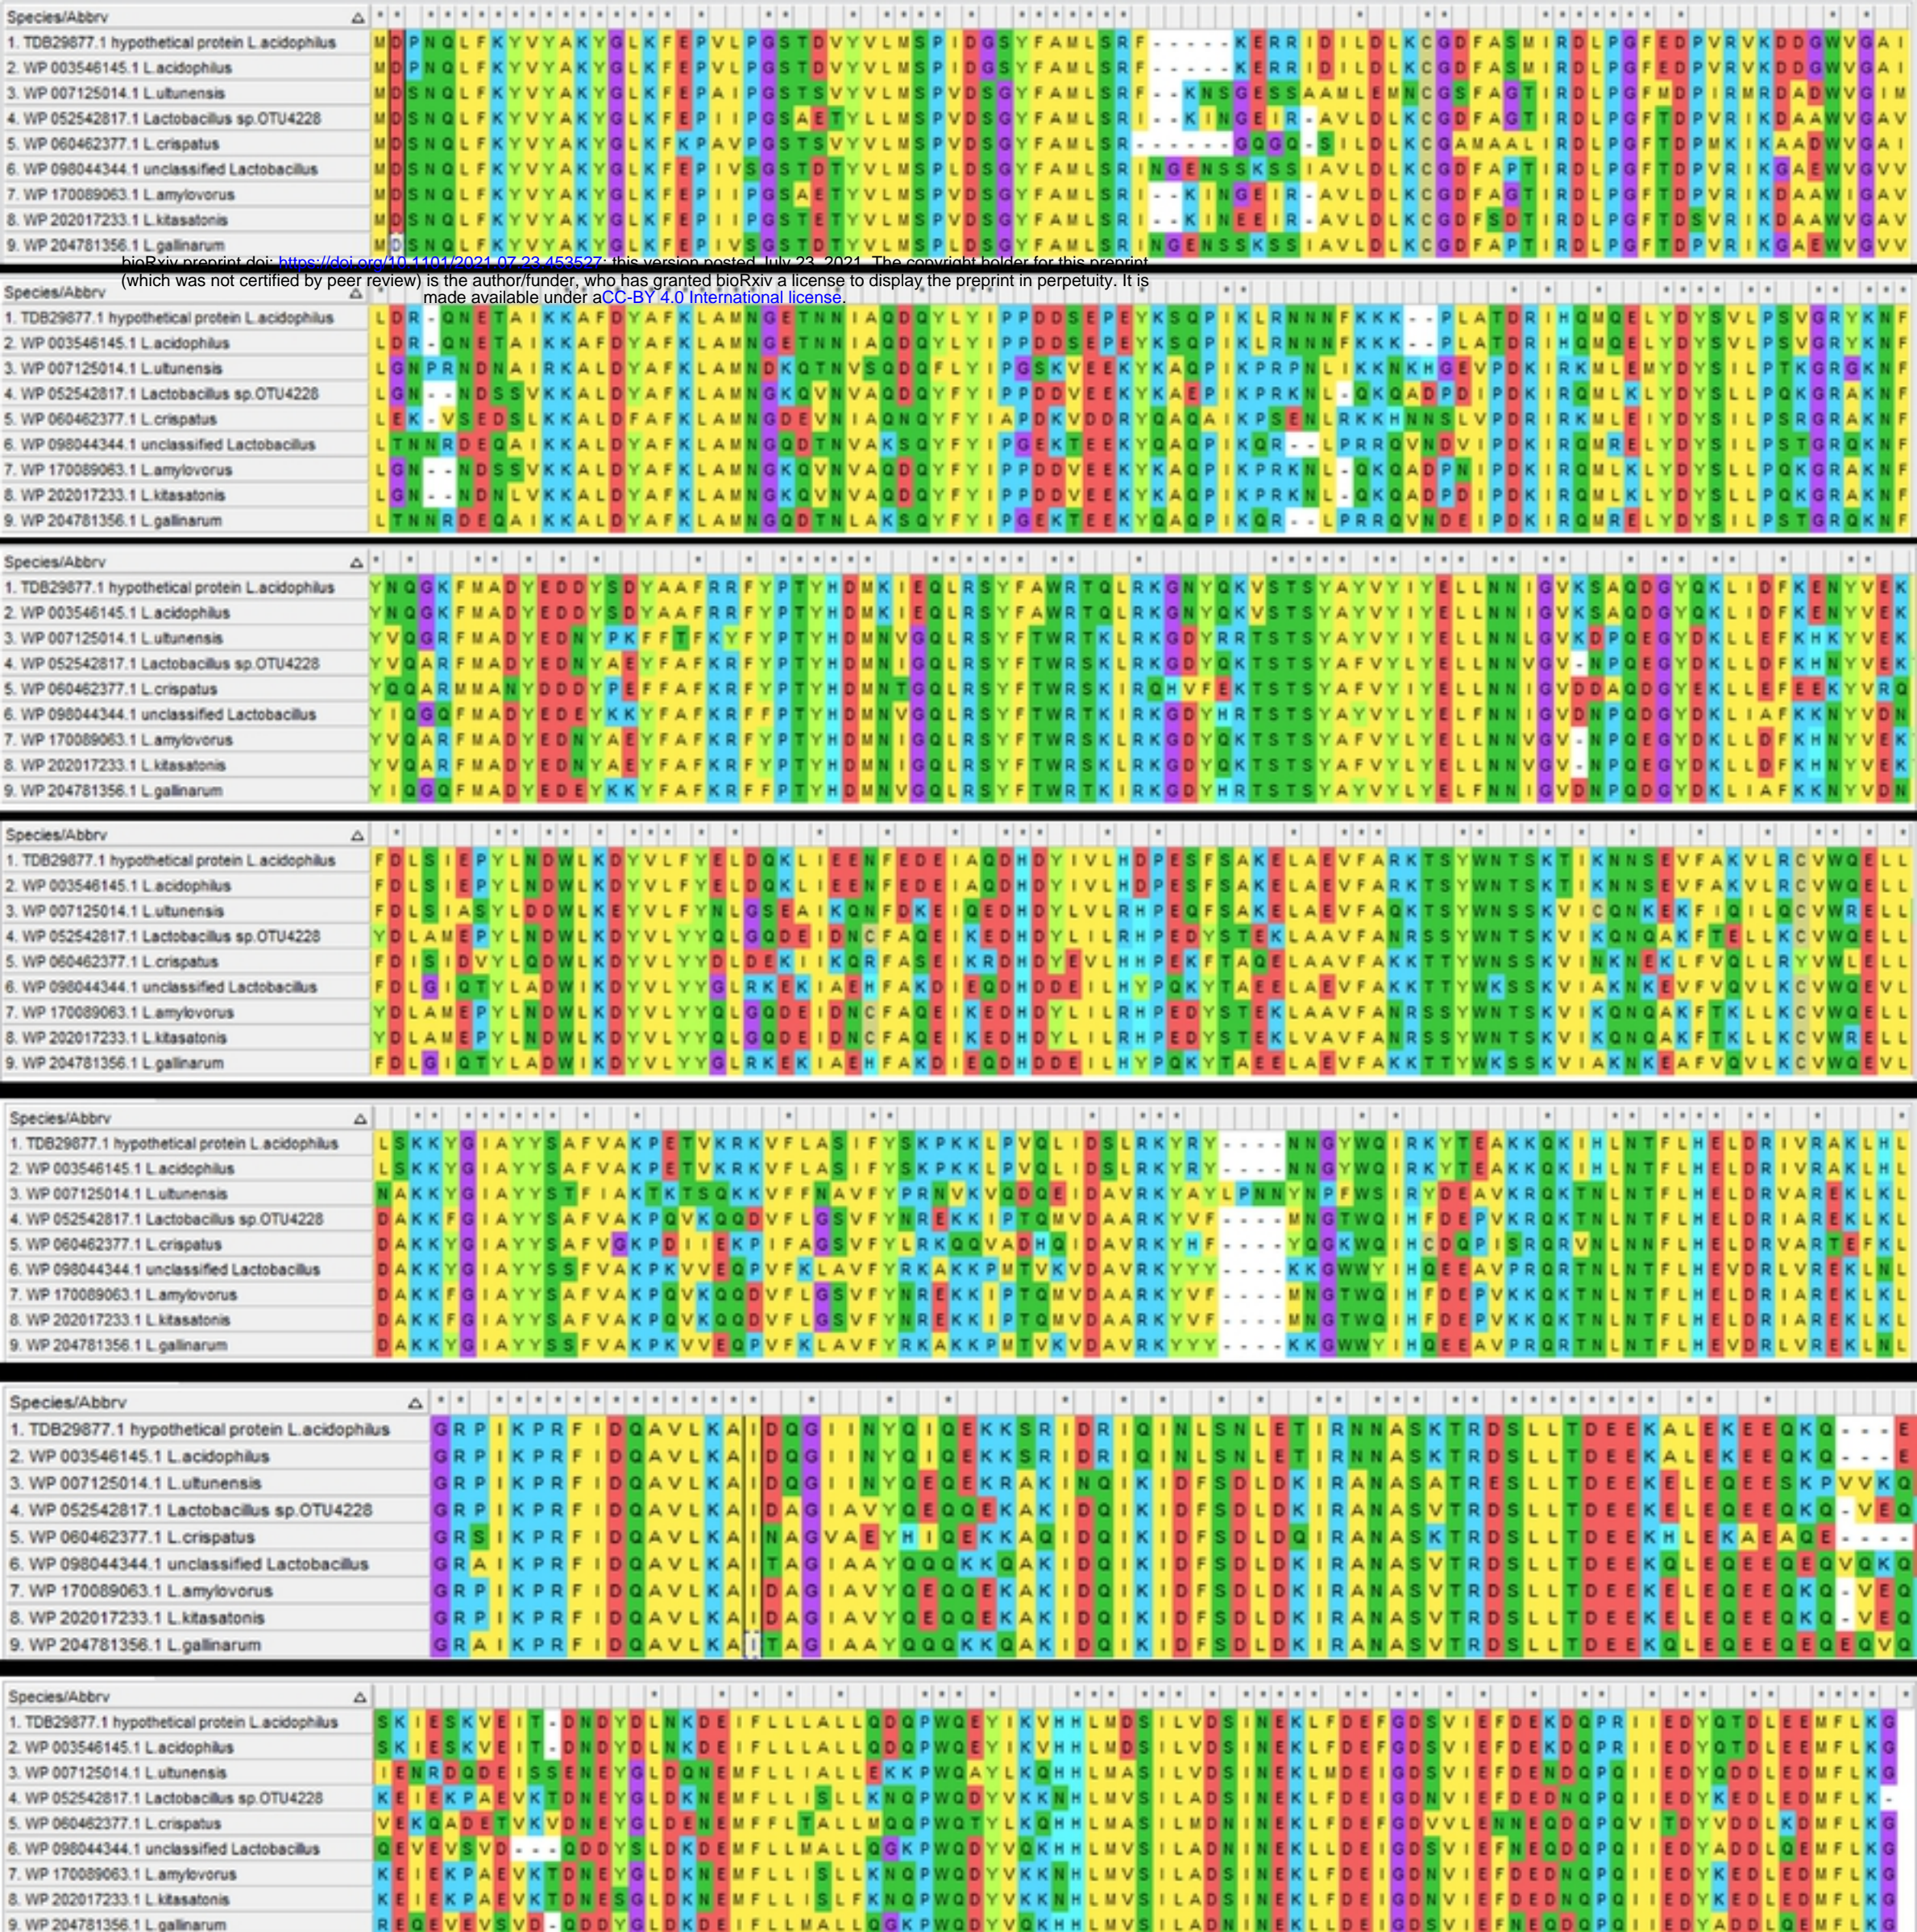

Fig1

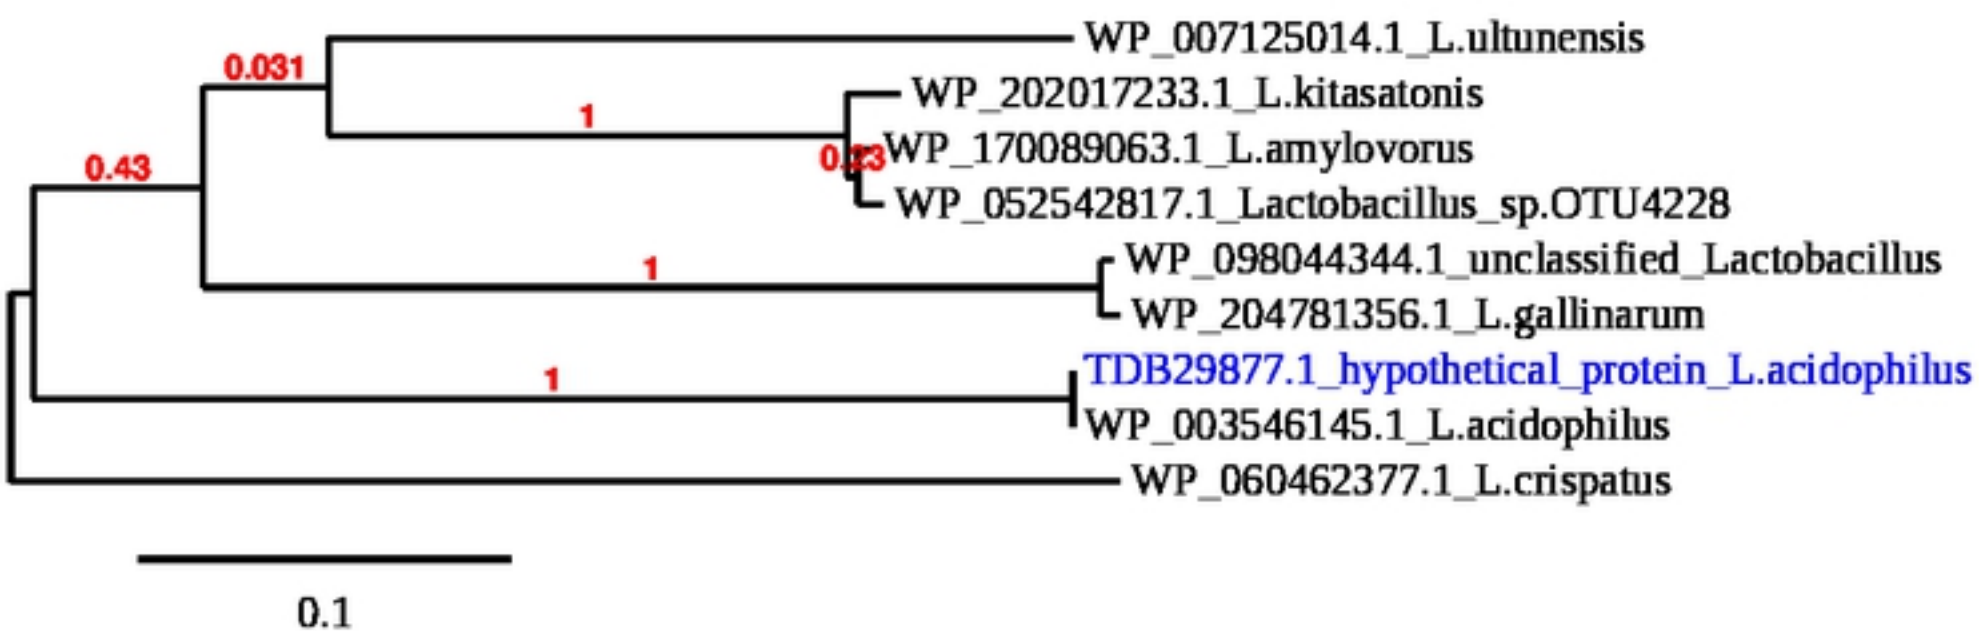

Fig2

## Protein Classification

TerB\_N and TerB\_C domain-containing protein (domain architecture ID 10590934)

TerB\_N and TerB\_C domain-containing protein

Graphical summary  Zoom to residue level show extra options >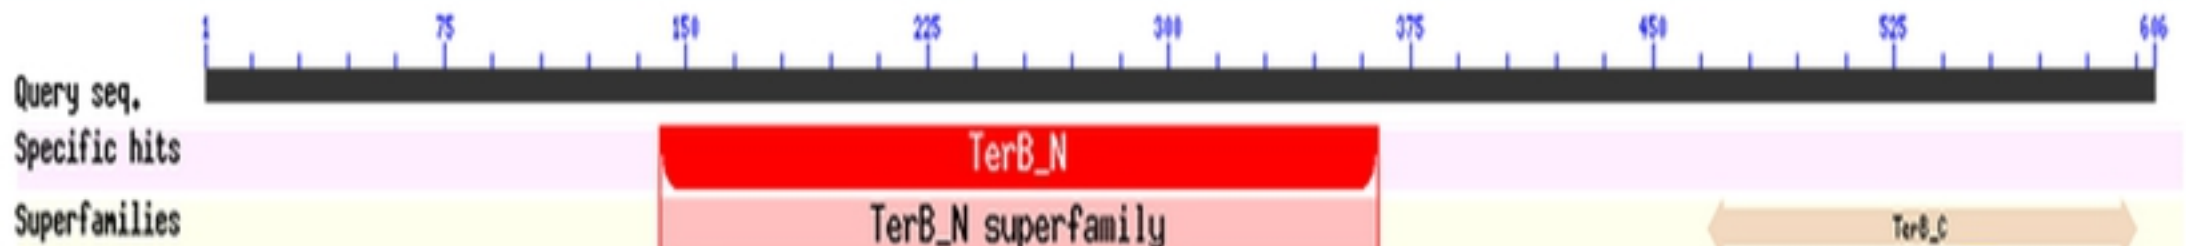

Pssm-ID: 404157 Cd Length: 203 Bit Score: 160.59 E-value: 8.42e-46

```

      10      20      30      40      50      60      70      80
      .....|.....|.....|.....|.....|.....|.....|.....|.....|.....|
seqsig_MDPNQ_c8cd862d30a647573b0348f5f8ac9673 142 NFKKKPLATDRIHQMQE-LYDYSvlpsvGRYKNFYNQGKFMADyeDDYSDYAAFRRFYPTYHDMKIEQLRSYFAWRTQLR 220
Cdd:pfam13208 2 VKVAGYSIPGGLVYVGTsLDGYR-----GREAFIDPSLSVAS--DGSDYFGPFMSYWP SYHSLSPAQRRA YLDWLAQGR 74

      90     100     110     120     130     140     150     160
      .....|.....|.....|.....|.....|.....|.....|.....|.....|.....|
seqsig_MDPNQ_c8cd862d30a647573b0348f5f8ac9673 221 KGnyQKVSTSYAYVYIYELLNNIQVKSADGYQKLIIDFKENYVEkfdlsIEPYLNDWLKDYvLPYELDQKLIIEENfeDEI 300
Cdd:pfam13208 75 KG--PDTDLGYVFLYFYGLERRVGVNDNPQEGYVKLIELPTIYAE-----LDRLADYGDY-SFREYATDLLDLA--RLL 144

      170     180     190     200     210     220
      .....|.....|.....|.....|.....|.....|.....|.....|.....|.....|
seqsig_MDPNQ_c8cd862d30a647573b0348f5f8ac9673 301 AQDHDYIVLHDFEFSAKELAEVFARKTSYWNTSKtiknnsEVFAKVLRCVWQELLLSKKYGIAY 365
Cdd:pfam13208 145 ASPDPYLLPFPETSAYELPLSLRVALGQYAADG-----EPLPAEWALAWALLHPELKLRTPA 203

```

Pssm-ID: 406129 Cd Length: 143 Bit Score: 70.84 E-value: 1.54e-14

```

      10      20      30      40      50      60      70      80
      .....|.....|.....|.....|.....|.....|.....|.....|.....|.....|
seqsig_MDPNQ_c8cd862d30a647573b0348f5f8ac9673 467 YQIQEKKSRIIdRIQINLSNLETIRNNASKTRDSL---LTDEEKALEKEEQKQESKIESKVEITDN-DYDLNKDEIFLLL 542
Cdd:pfam15615 5 EEAEAAARK--GISLDLDRIAAIQEETAAVSALLaeiFEEETEELAEILEPPESEEAETALADKvDEGLDEAHSAPLR 82

      90     100     110     120     130     140
      .....|.....|.....|.....|.....|.....|.....|.....|.....|.....|
seqsig_MDPNQ_c8cd862d30a647573b0348f5f8ac9673 543 ALLQDQPW-----QEYIKVHHLMDSILVDSINEKLFDFEPGDSVIEFDekDQPRIIEDYQTDLE 600
Cdd:pfam15615 83 LLLARAQWpreevESLARDHGLMPDGAIESINENAFDFDLDLVIEDD--DPIEINEDYLEELR 143

```

Fig3(a)

Coils output for UNKNOWN

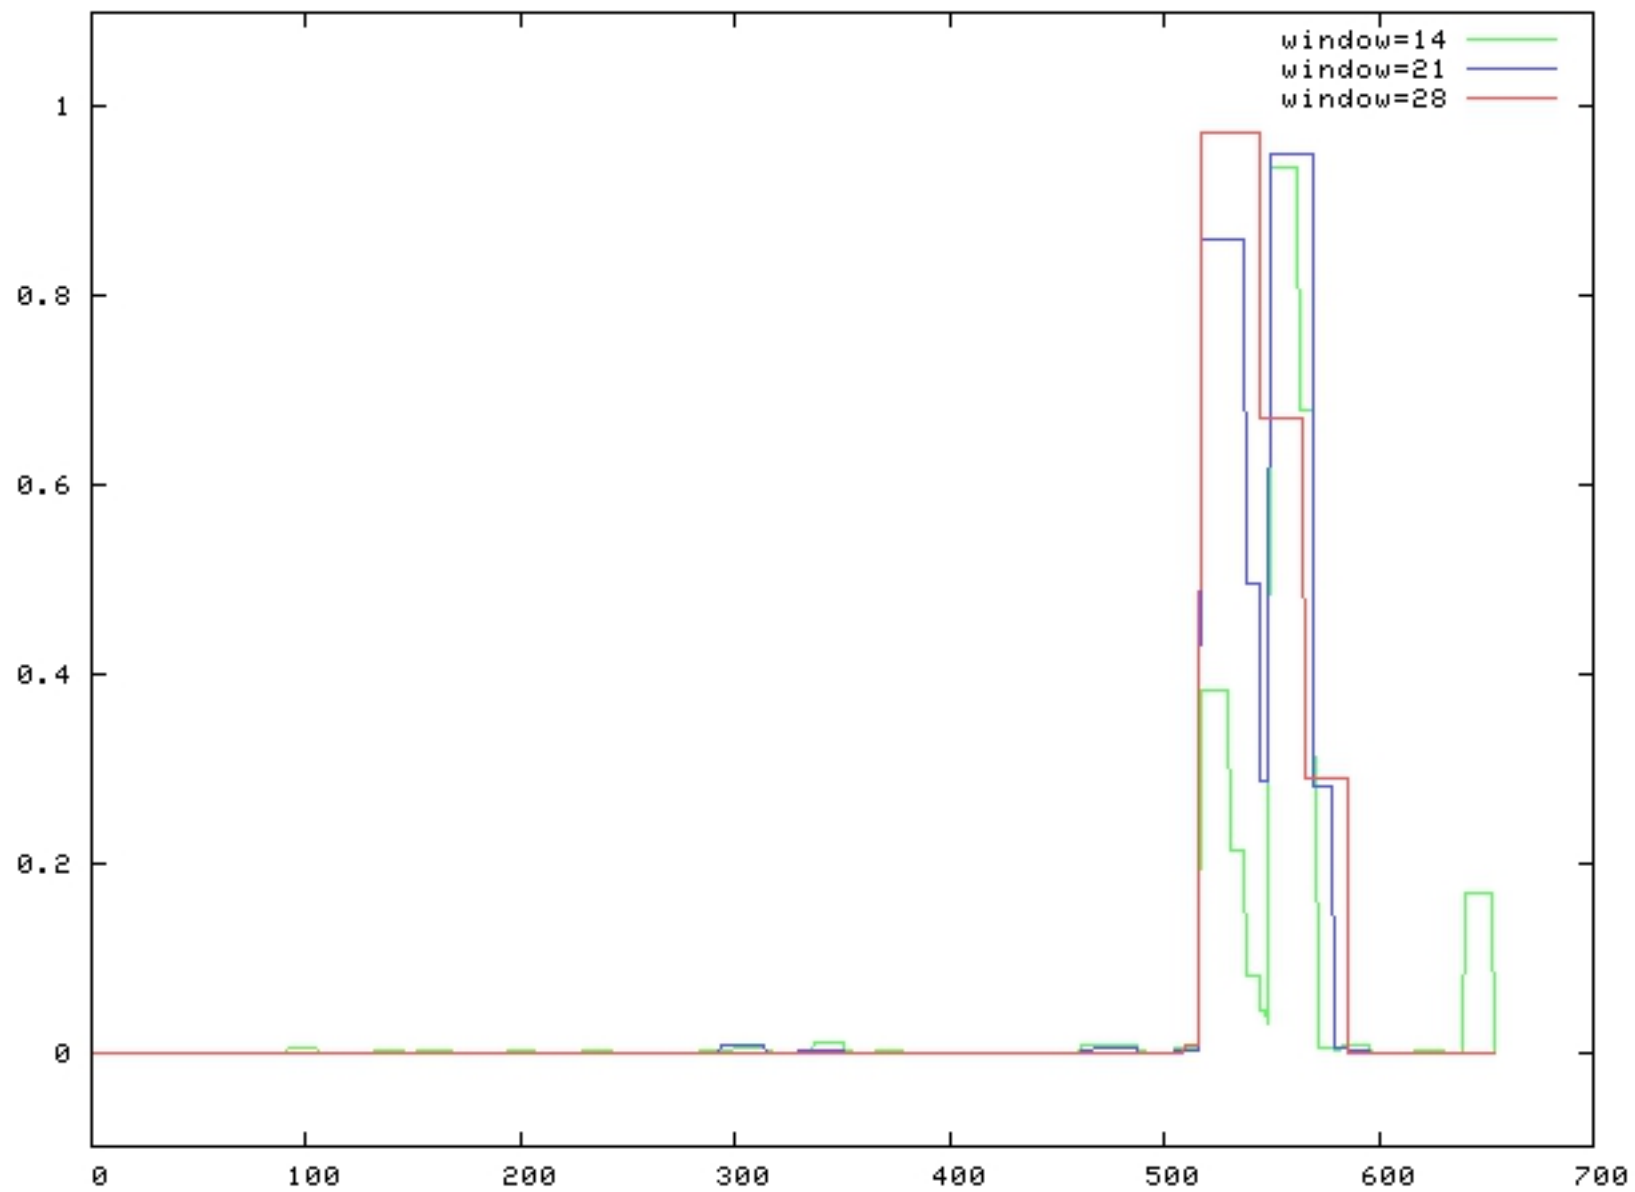

Fig3(c)



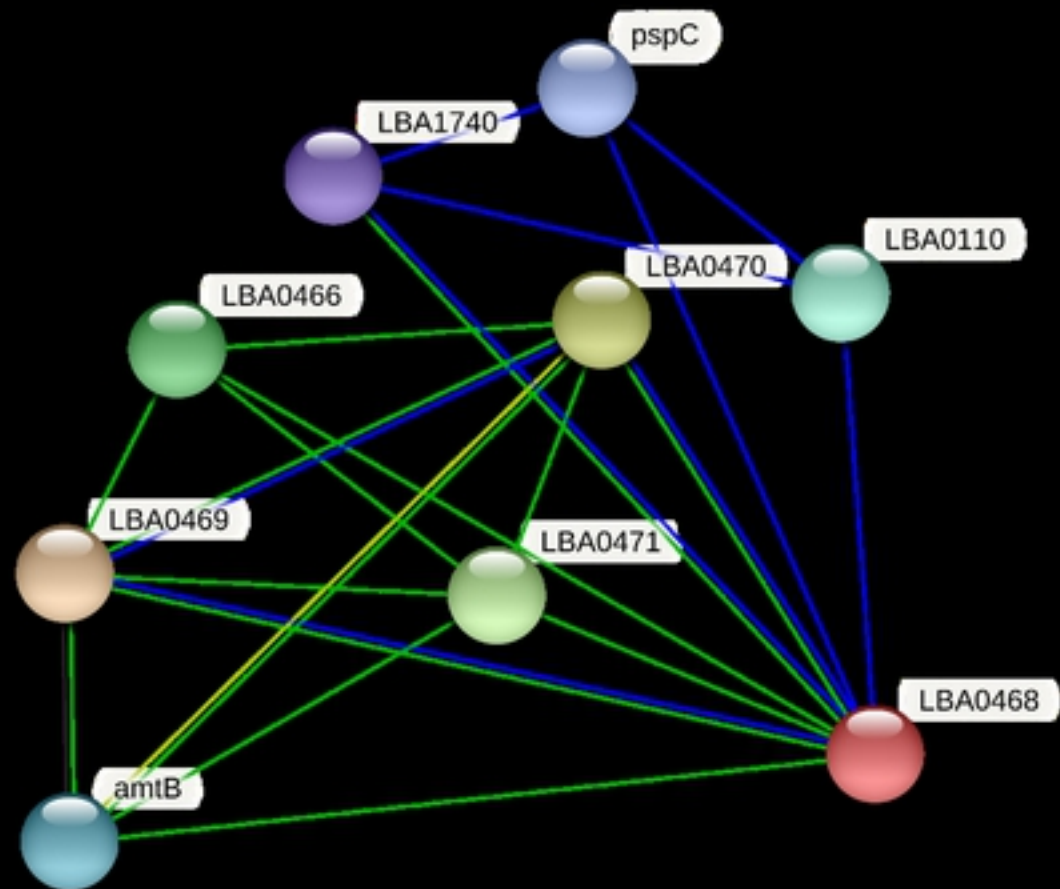

Fig4

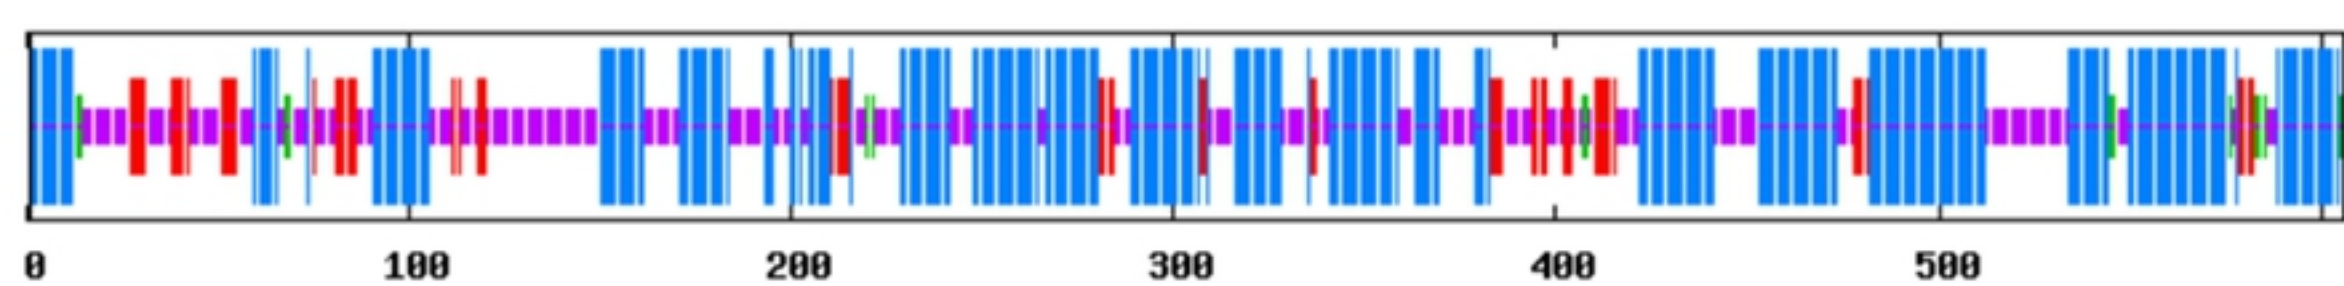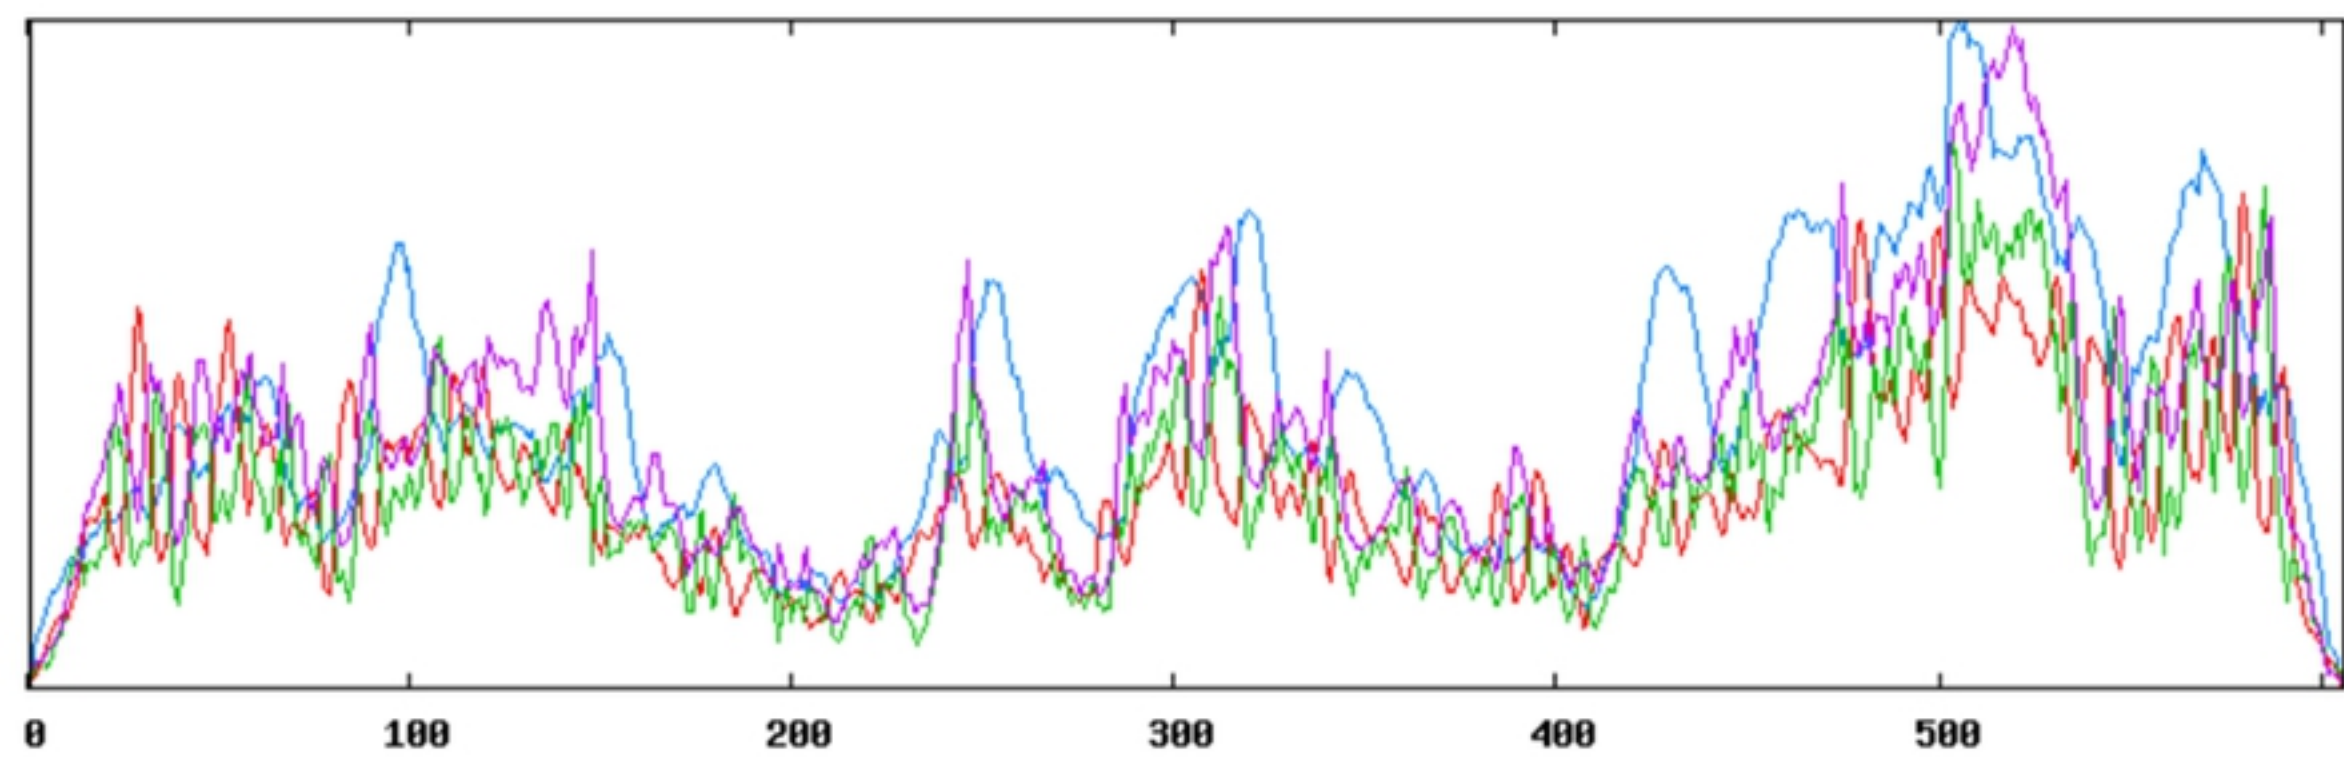

Fig5(a)

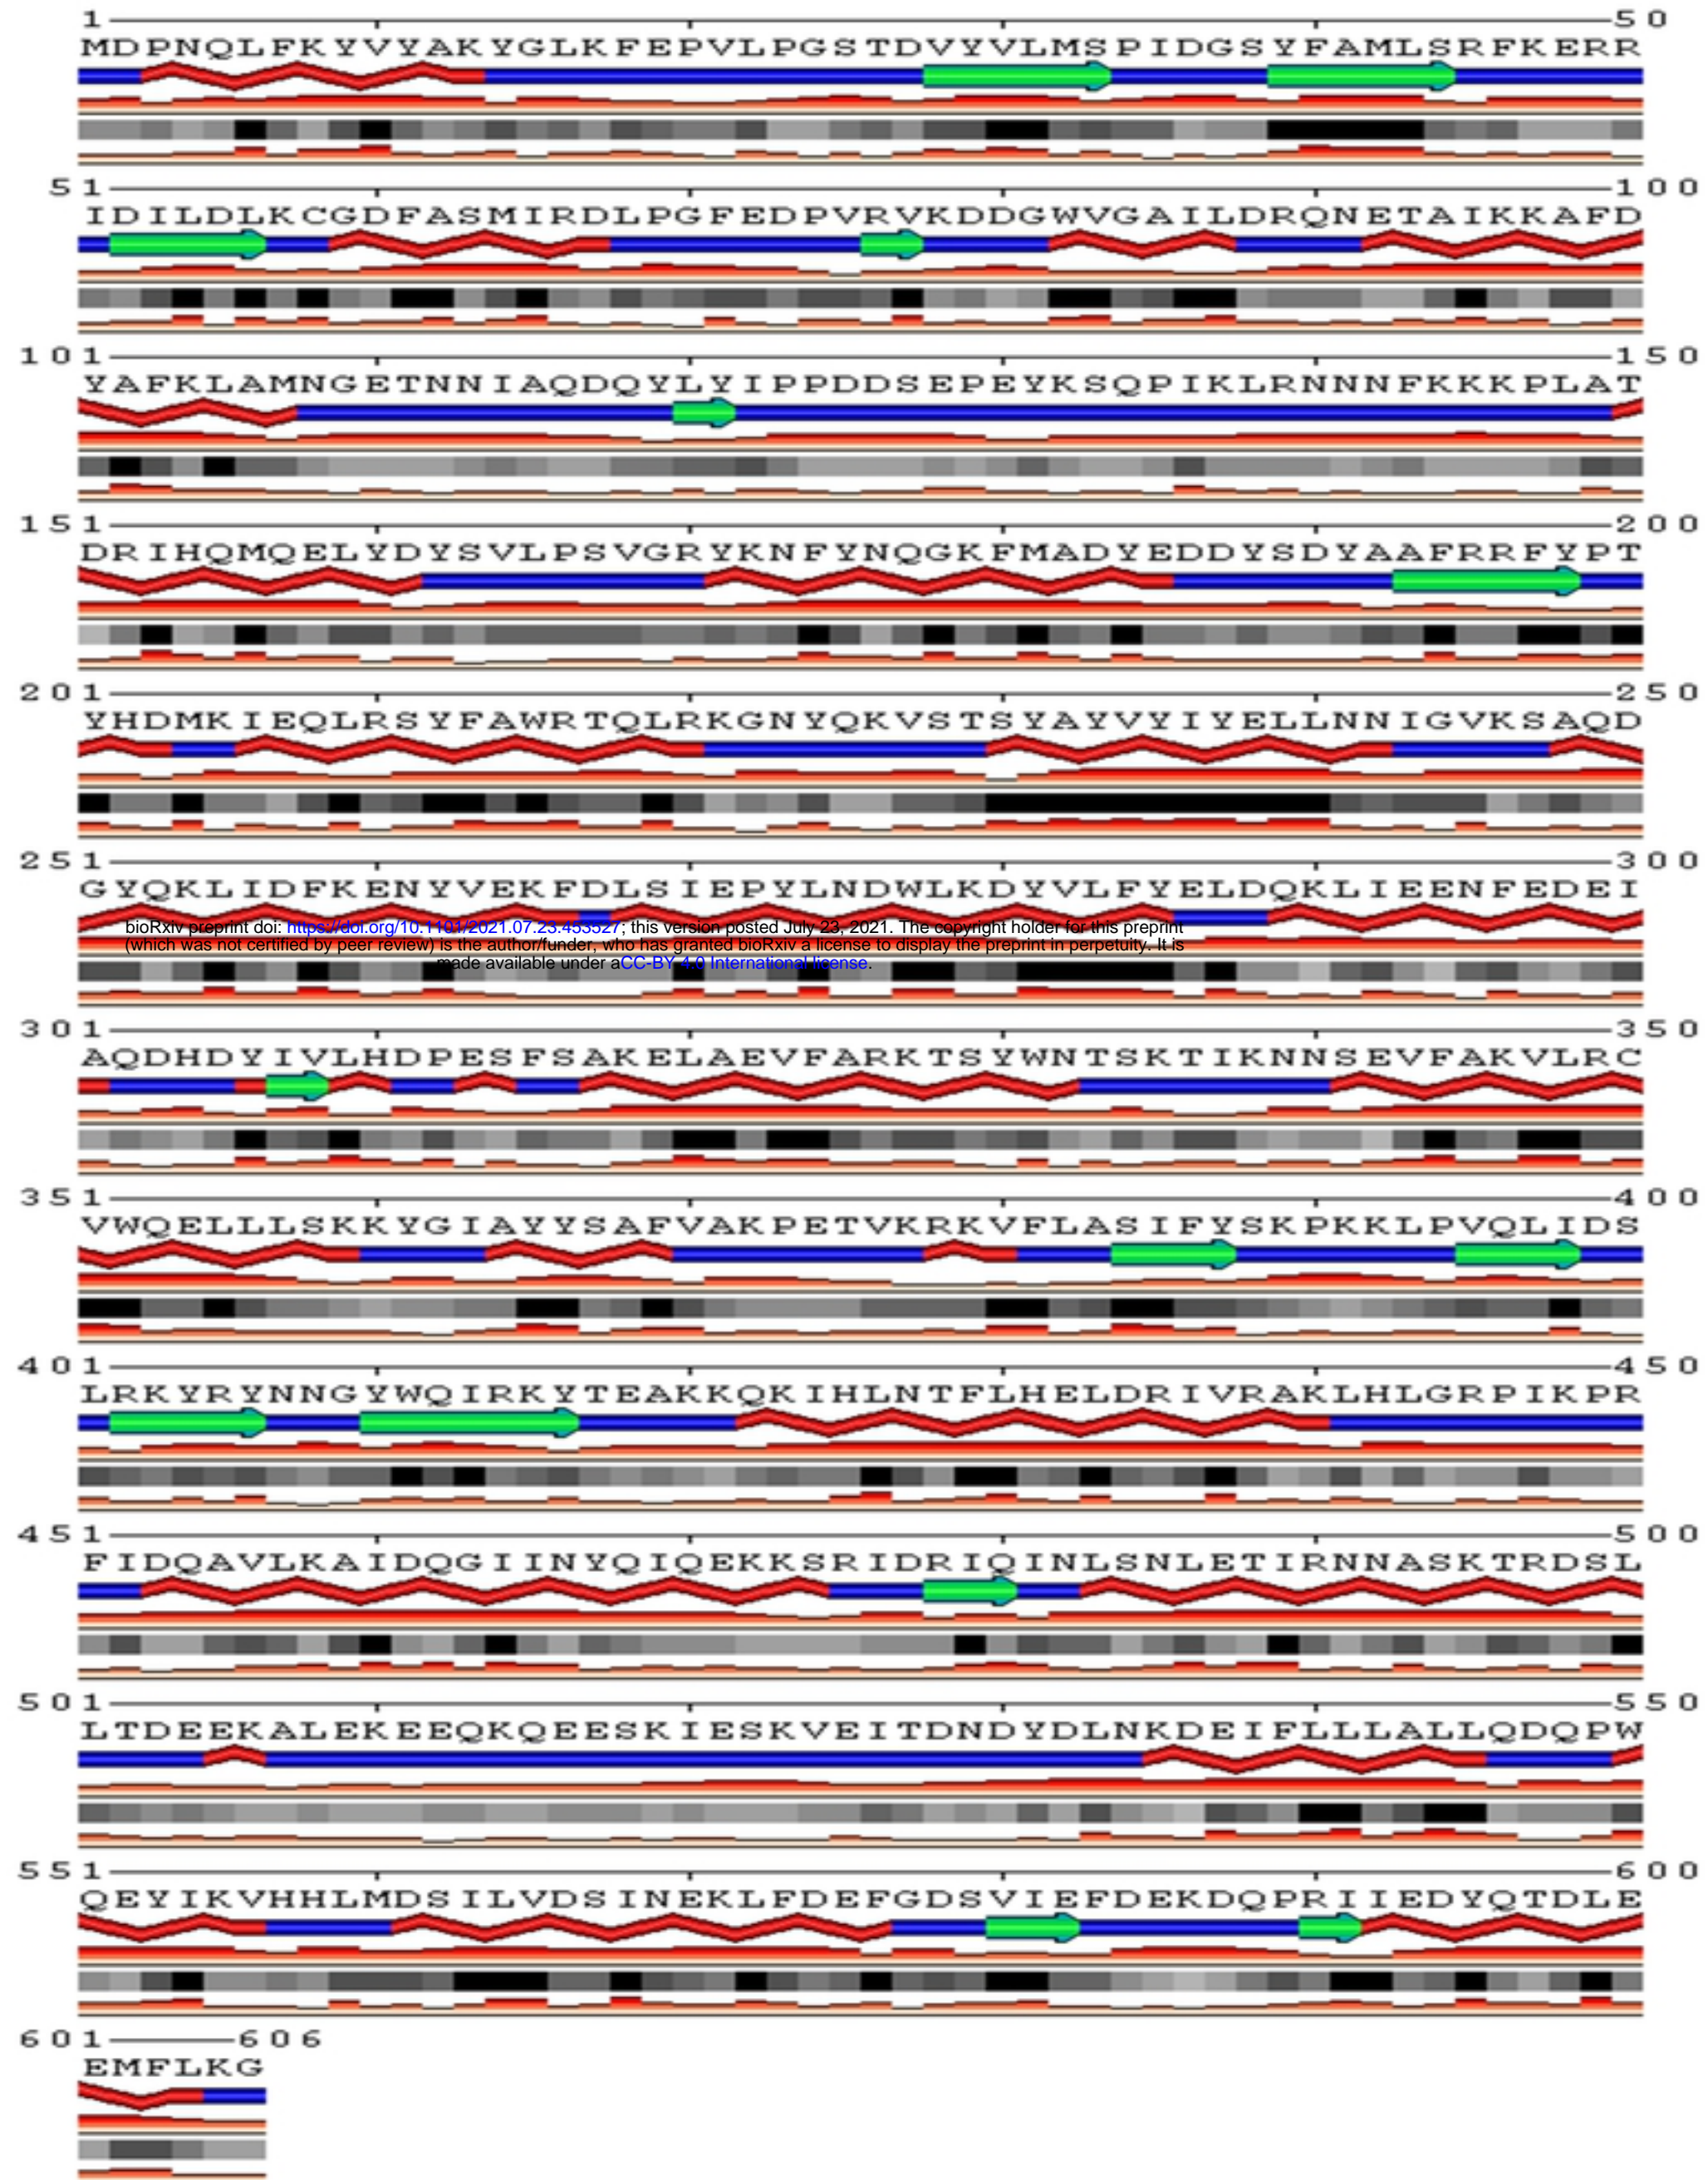

bioRxiv preprint doi: <https://doi.org/10.1101/2021.07.25.453527>; this version posted July 23, 2021. The copyright holder for this preprint (which was not certified by peer review) is the author/funder, who has granted bioRxiv a license to display the preprint in perpetuity. It is made available under aCC-BY 4.0 International license.

### Legend

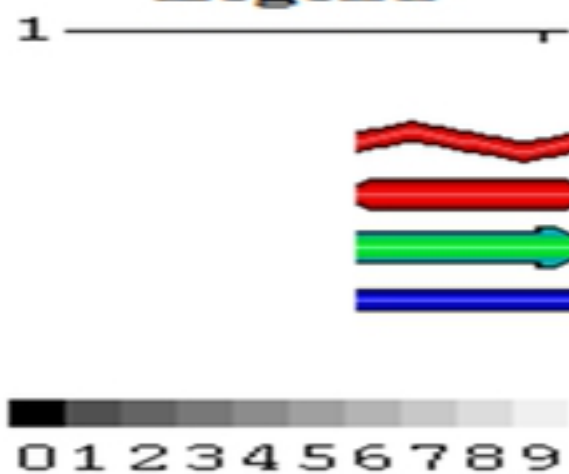

### Description

- Amino acid residue numeration*
- Protein secondary structure*
- H-alpha and other helices (model 1)**
- H-alpha and other helices (model 2)**
- E-beta-strand or bridge**
- C-coil**
- Relative solvent accessibility (RSA)*
- 0-completely buried (0-9% RSA),**
- 9-fully exposed (90-100% RSA)**

Fig5(b)

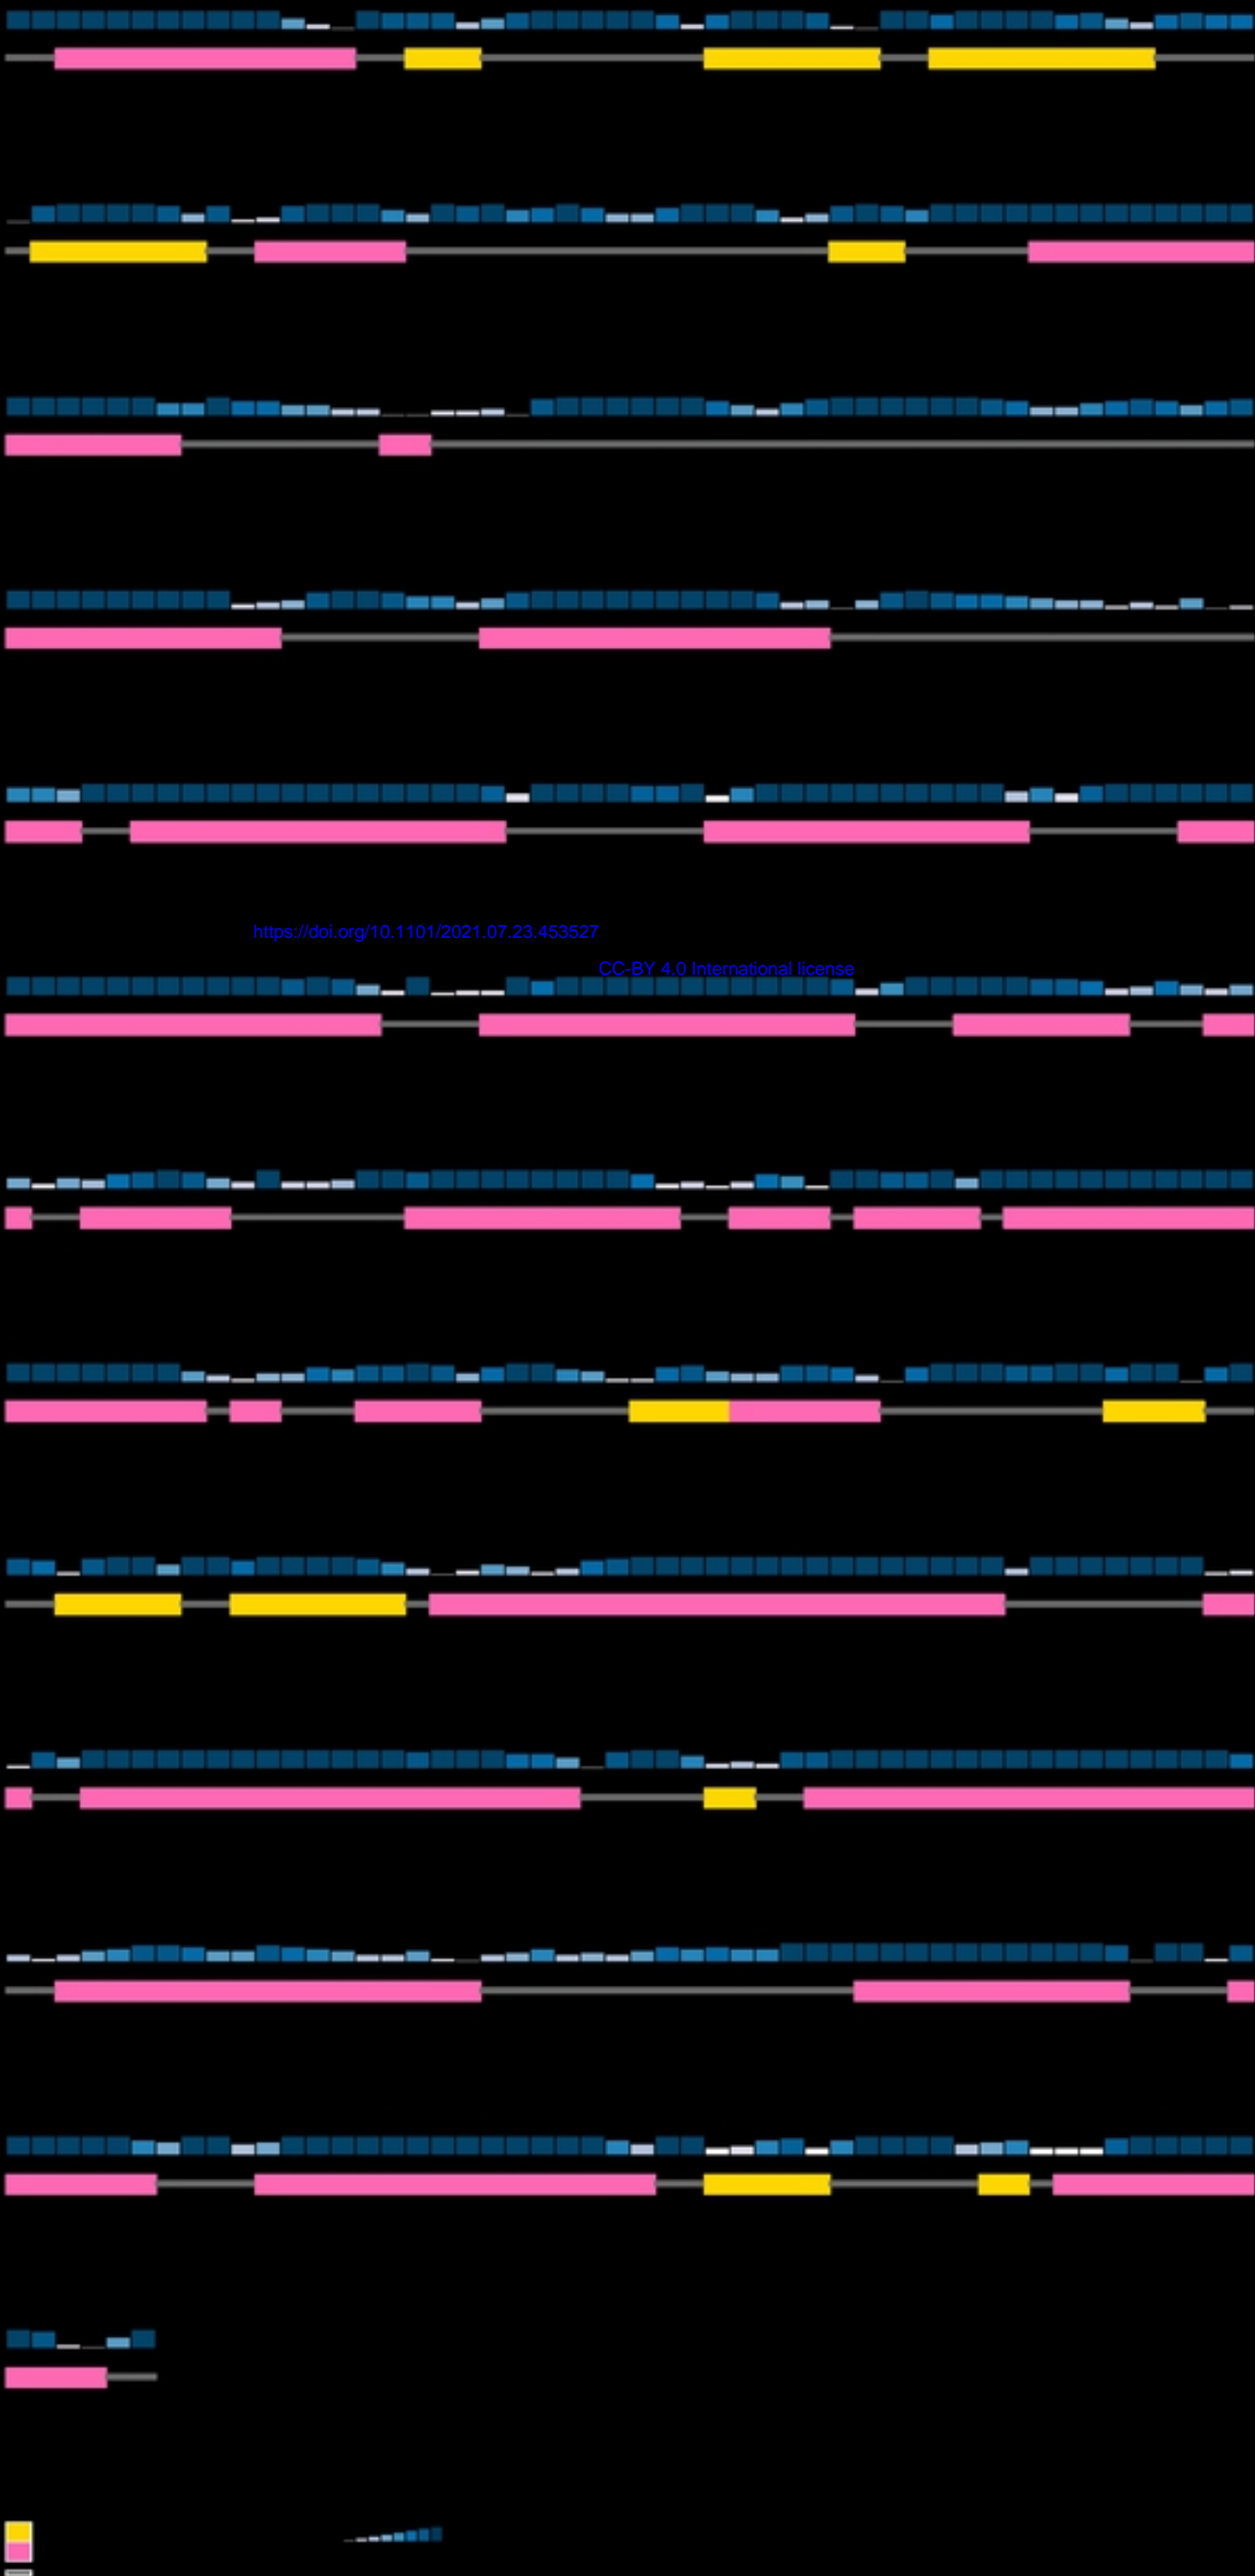

Fig5(c)

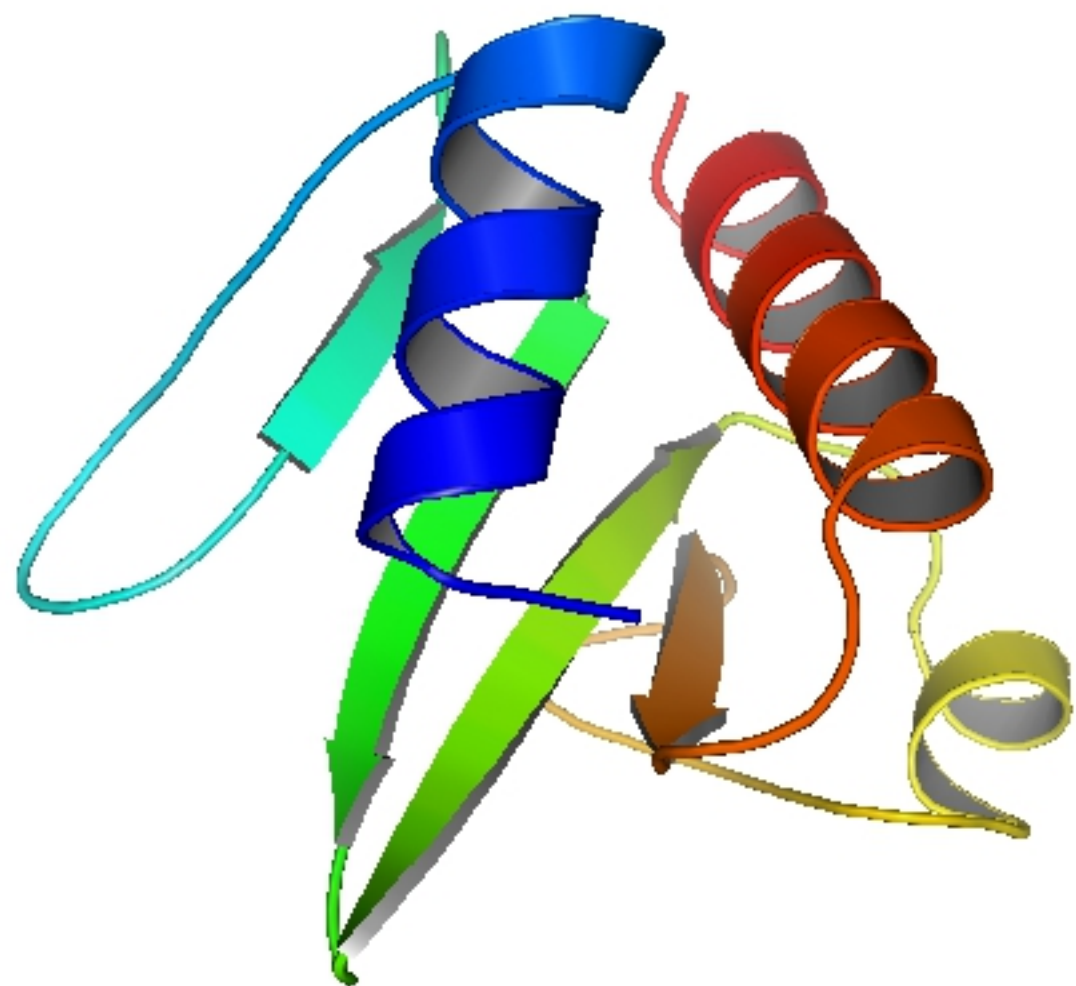

Fig6

## Global Quality Estimate

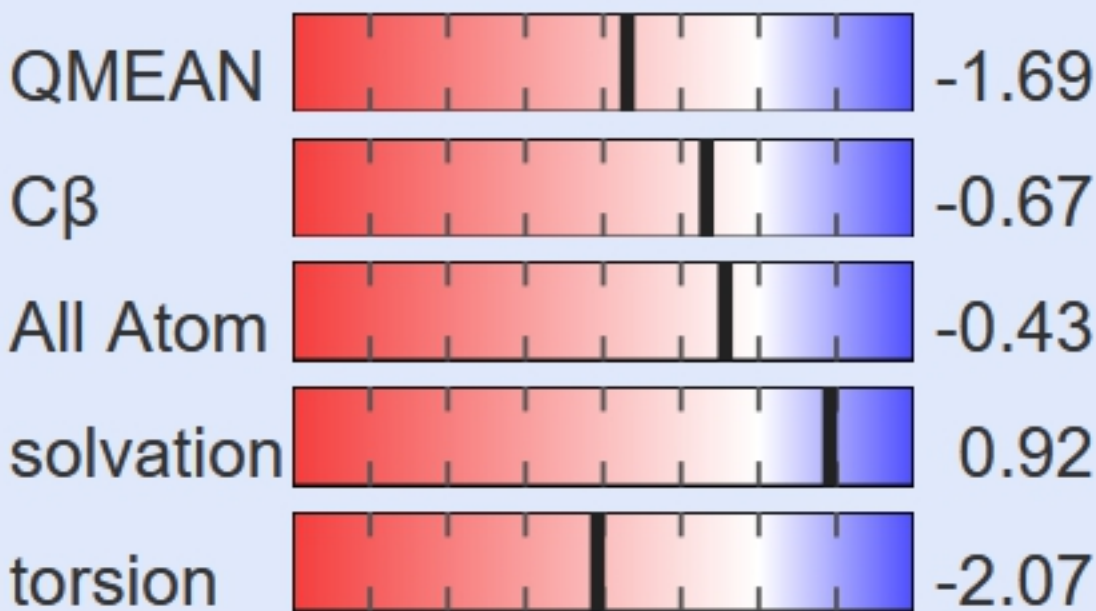

Fig7(a)

# Local Quality Estimate

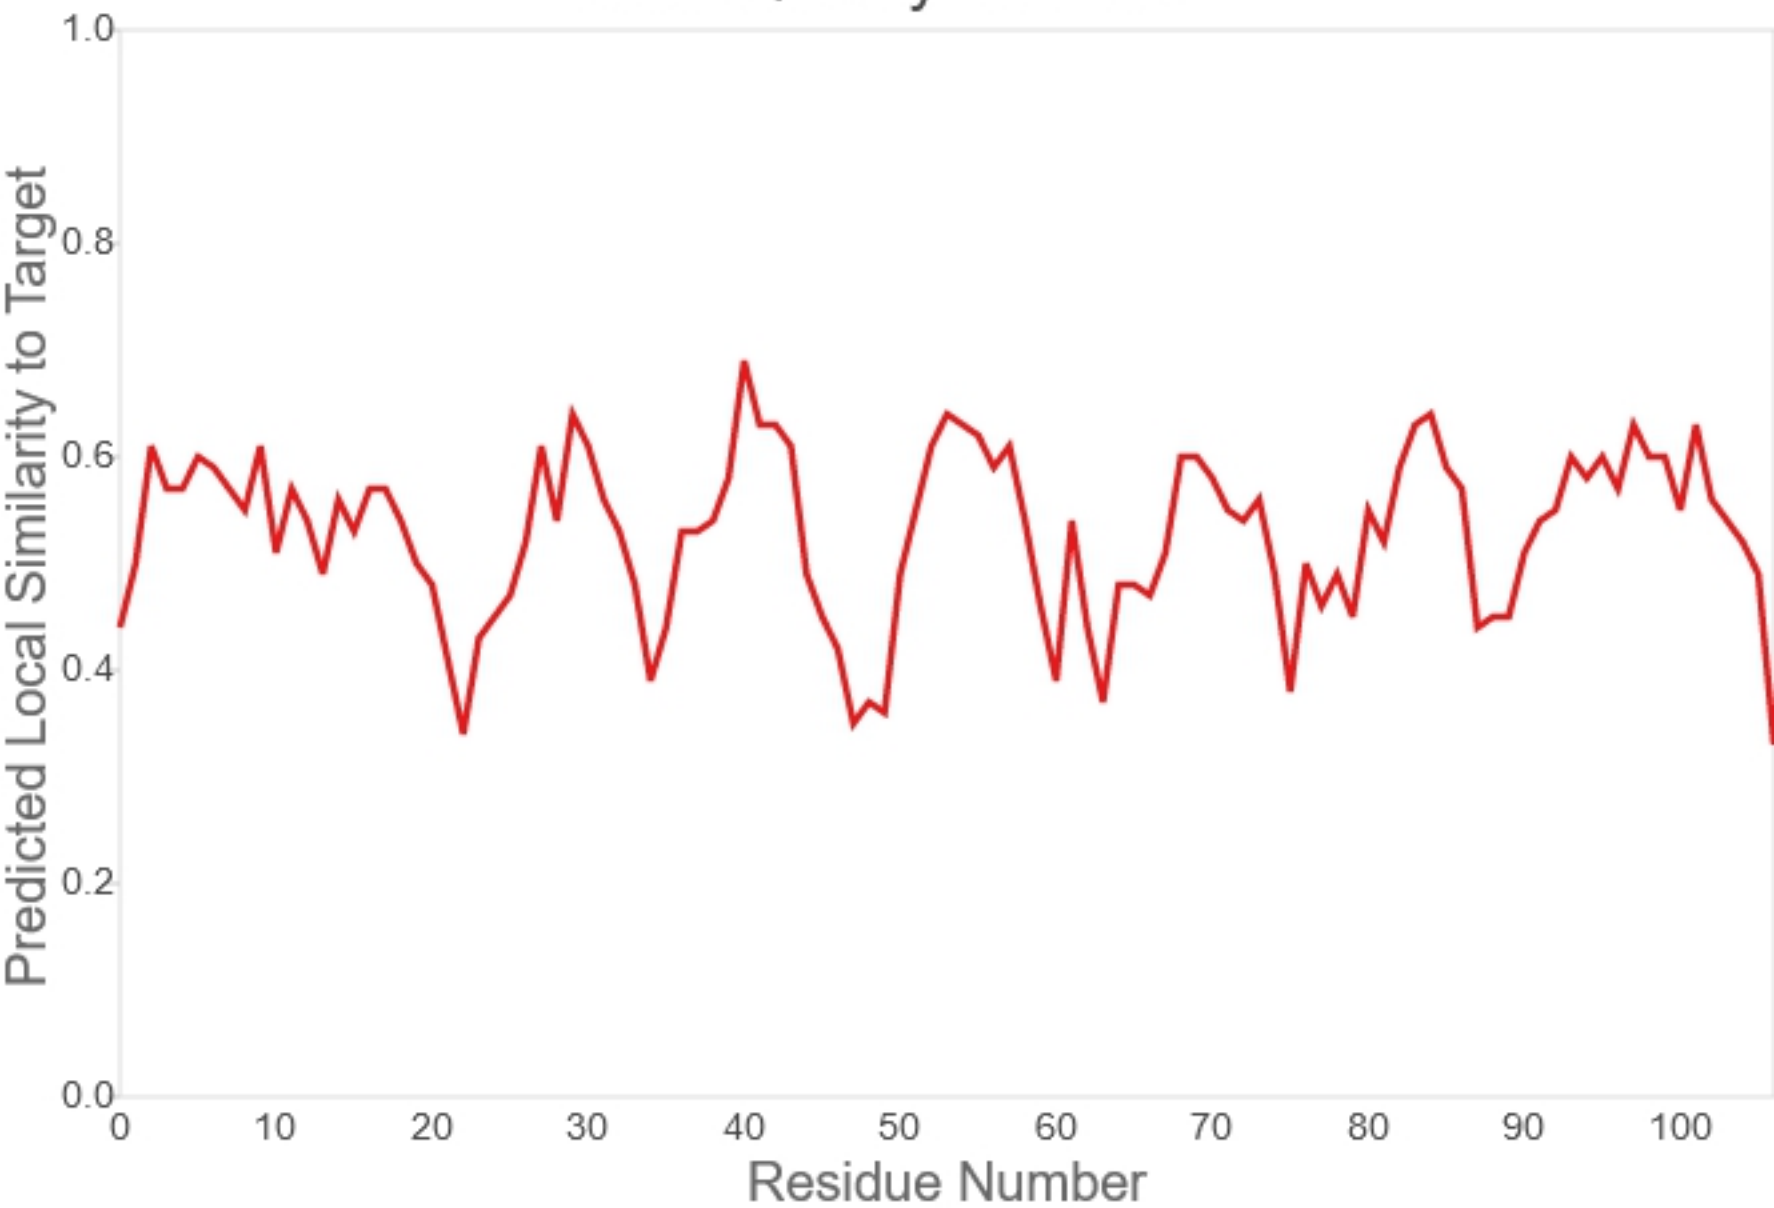

Fig7(b)

# Comparison with Non-redundant Set of PDB Structures

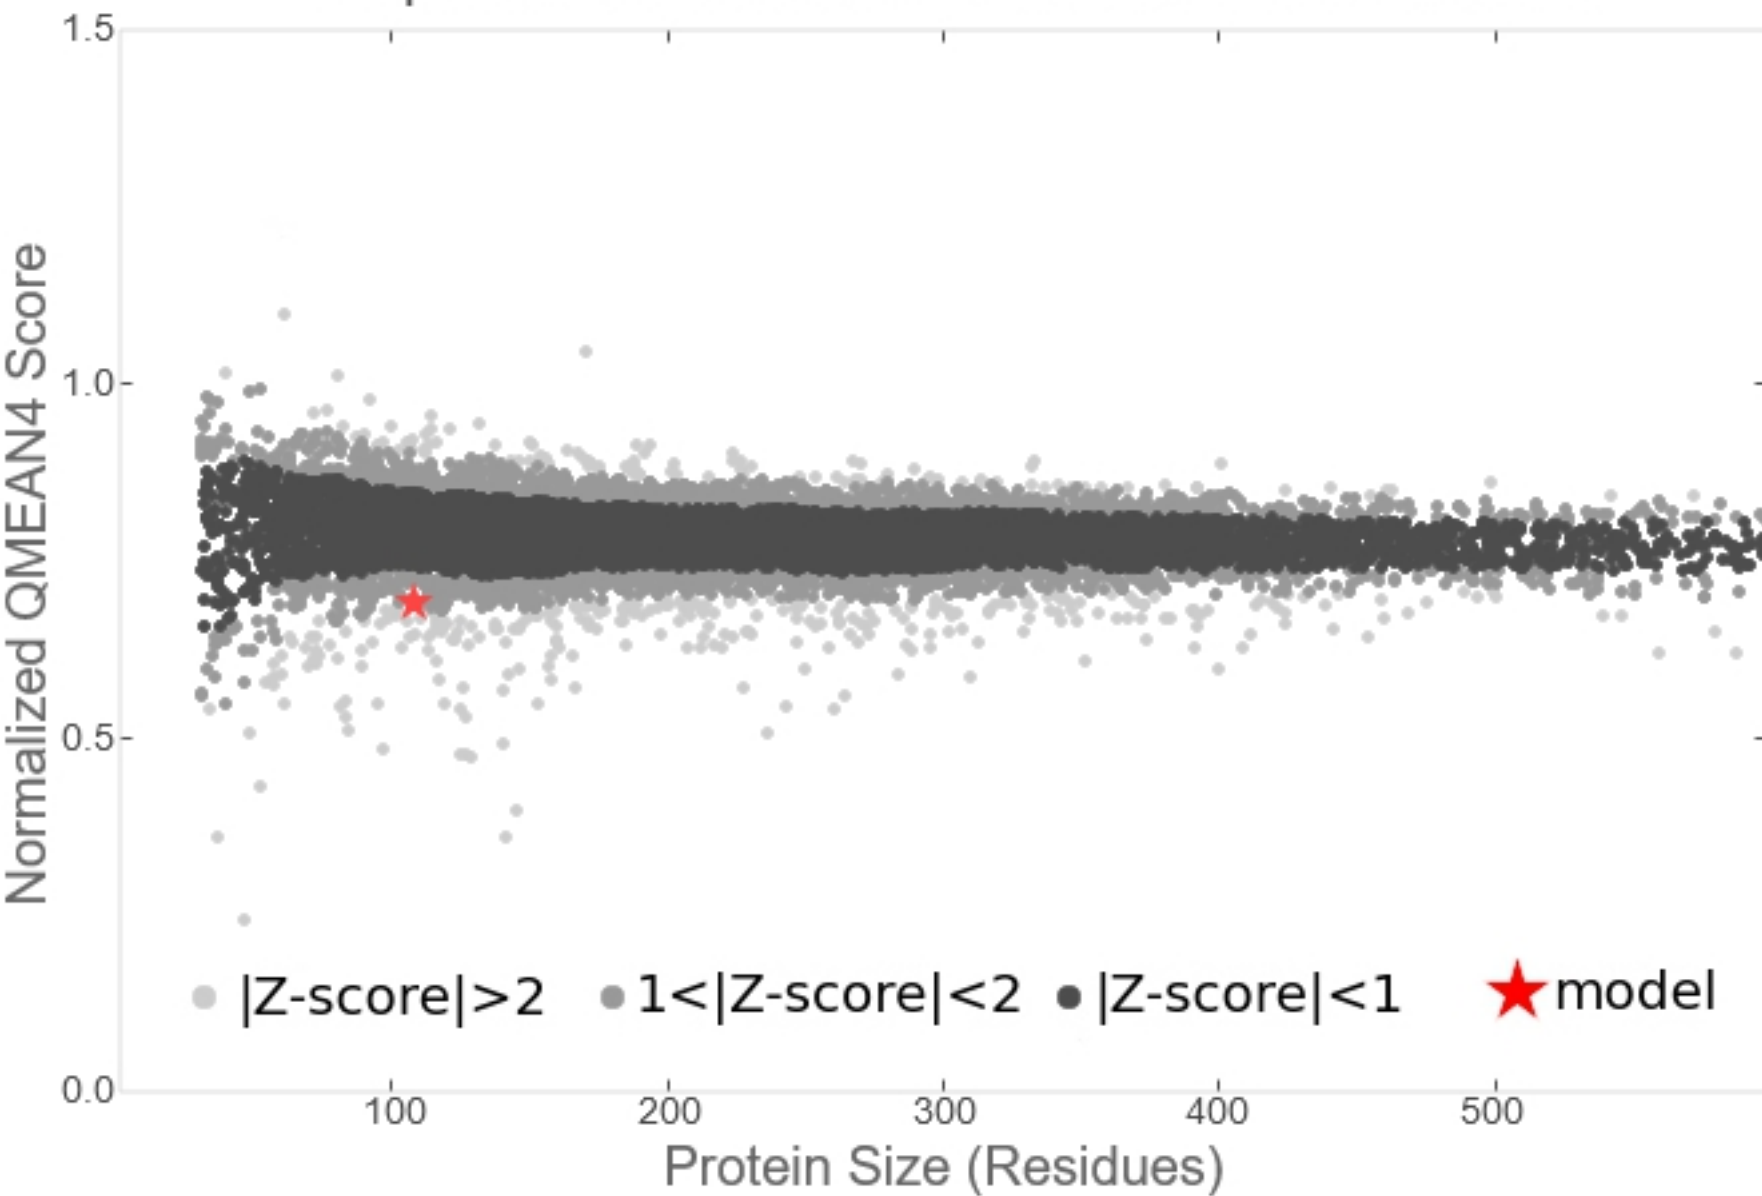

Fig7(c)



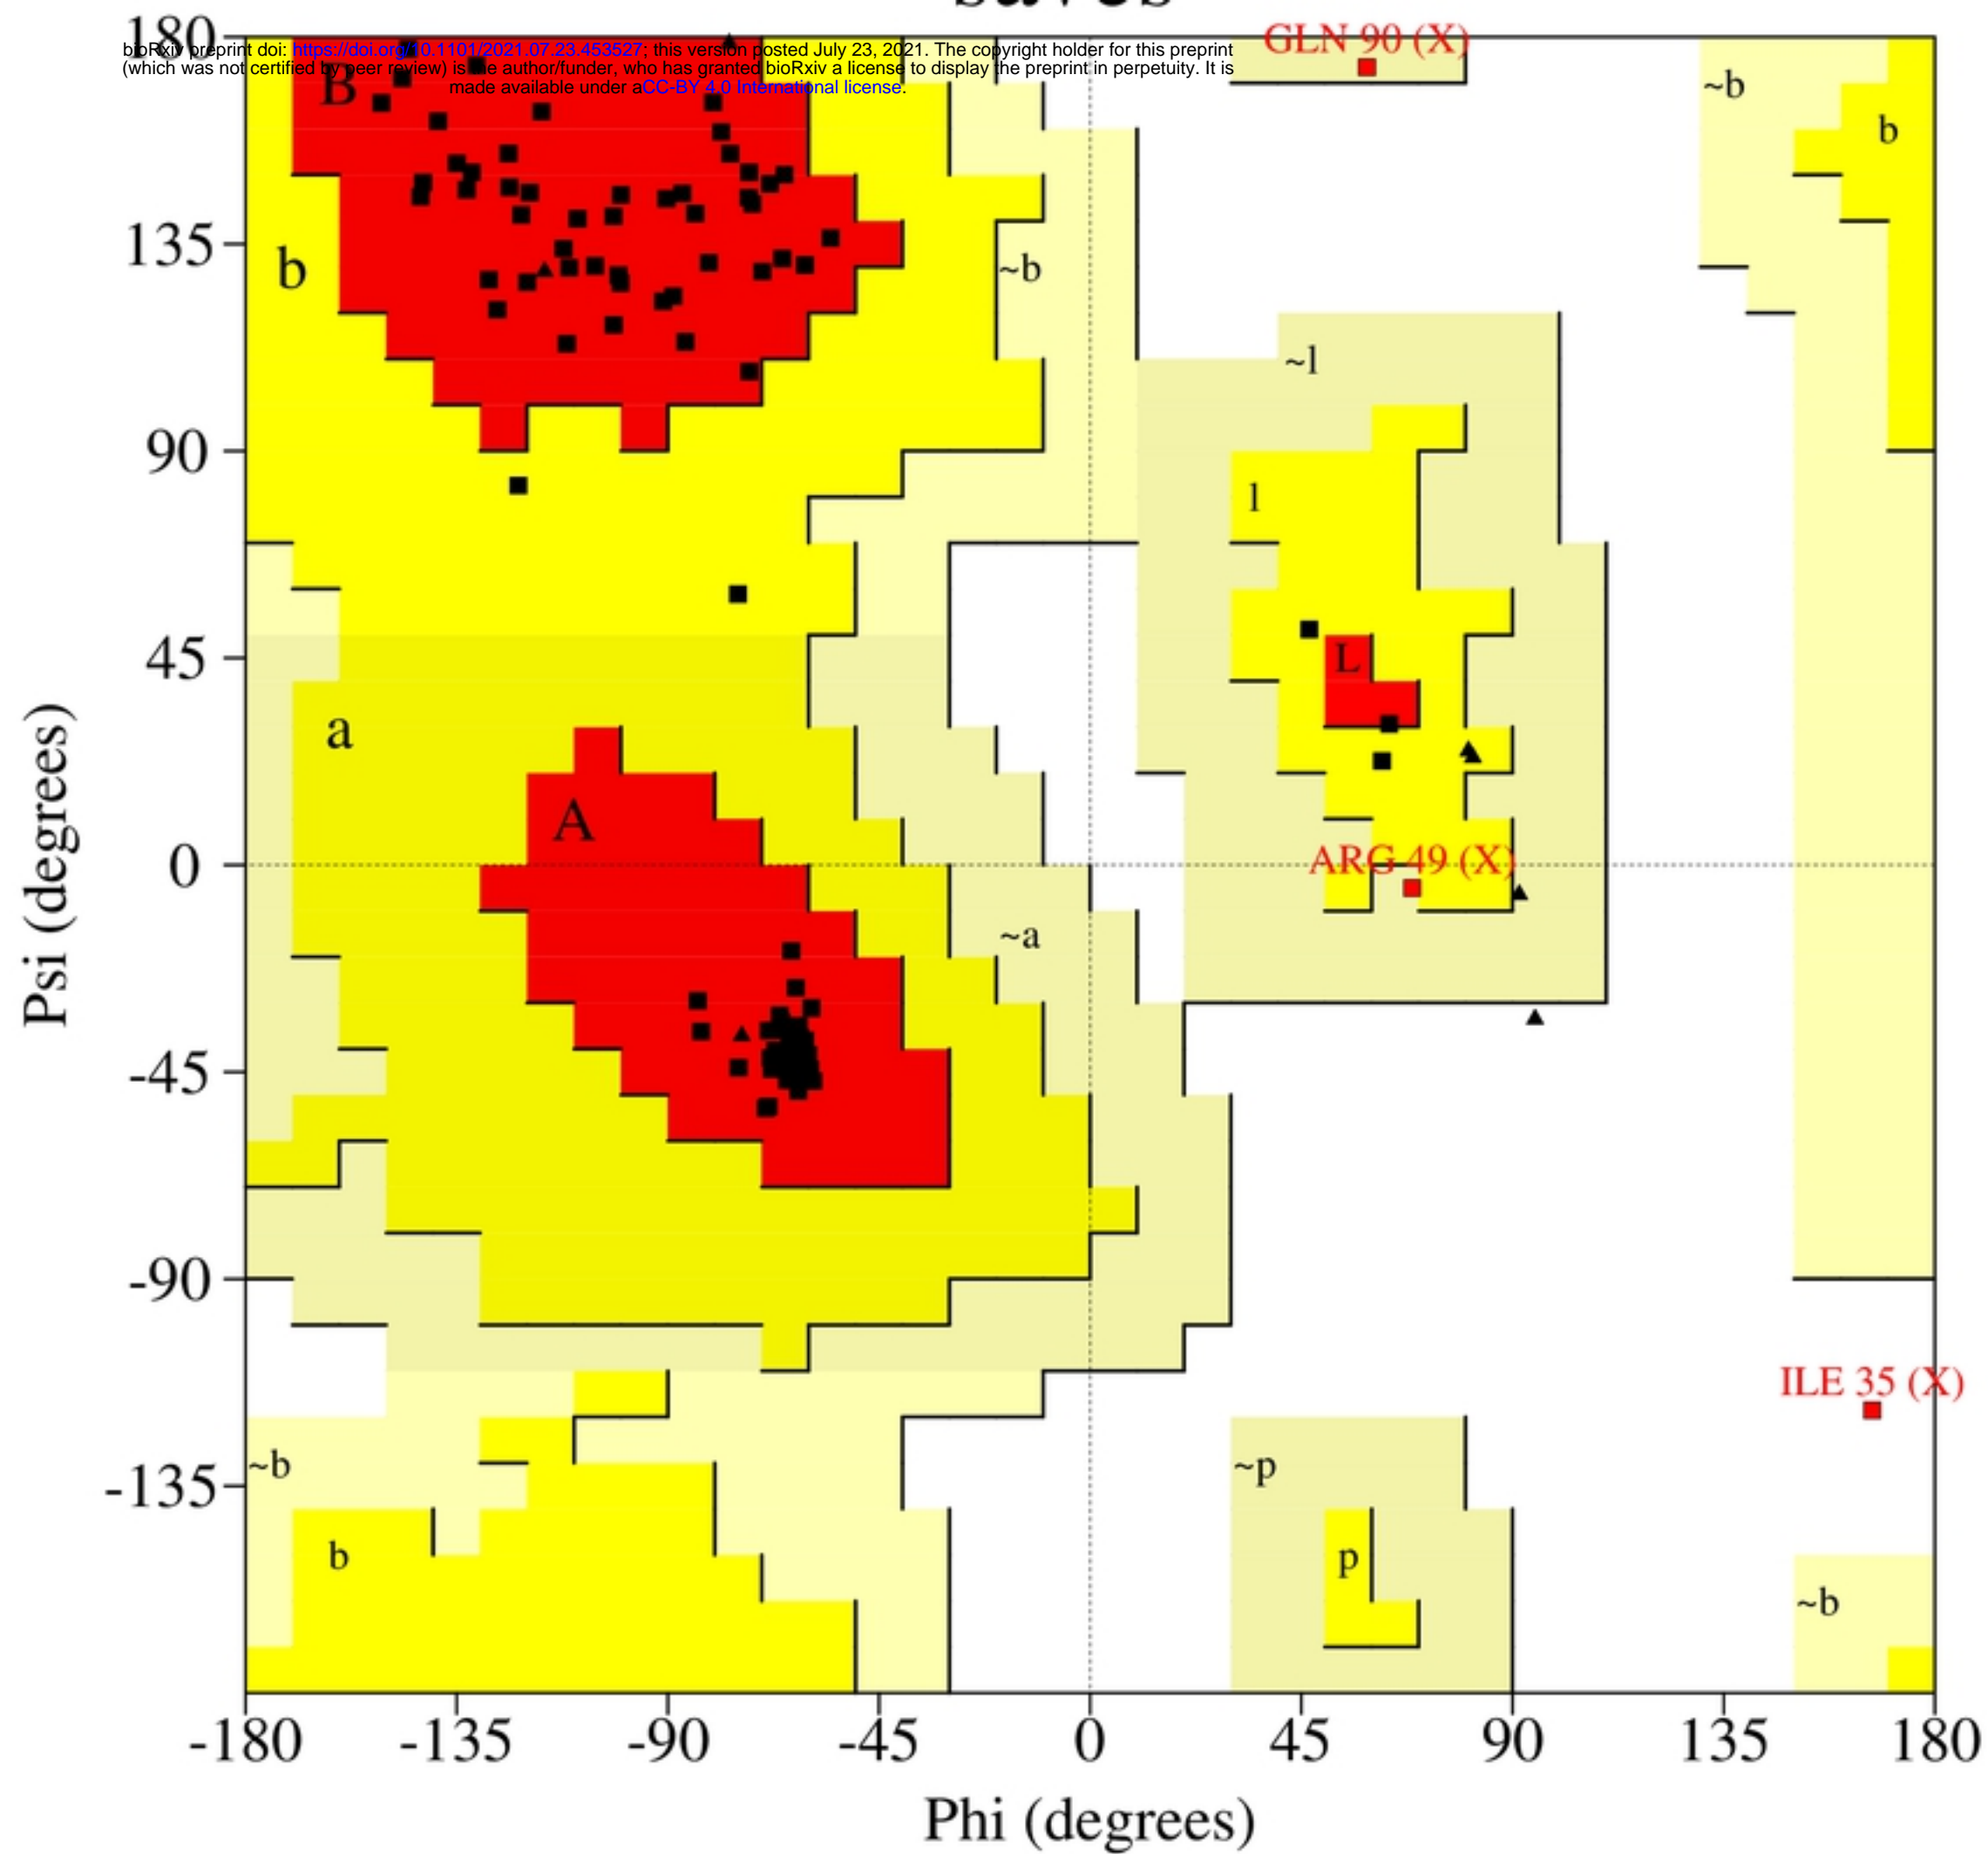

Fig8

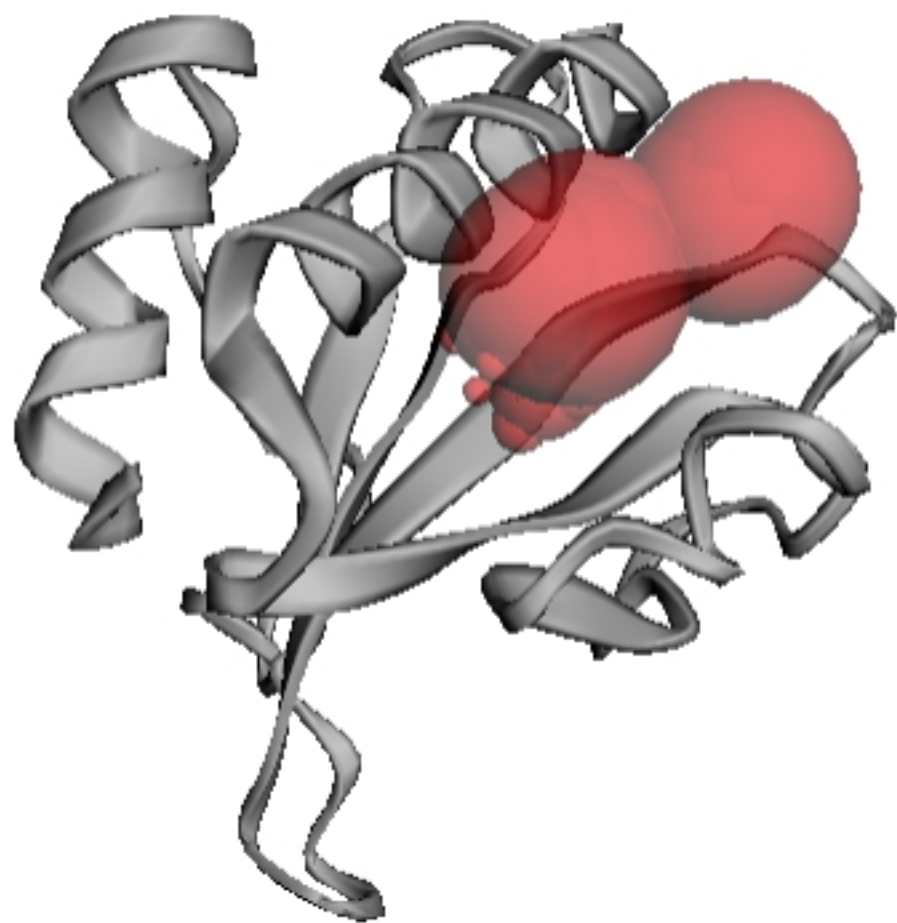

Fig9(a)

Chain X

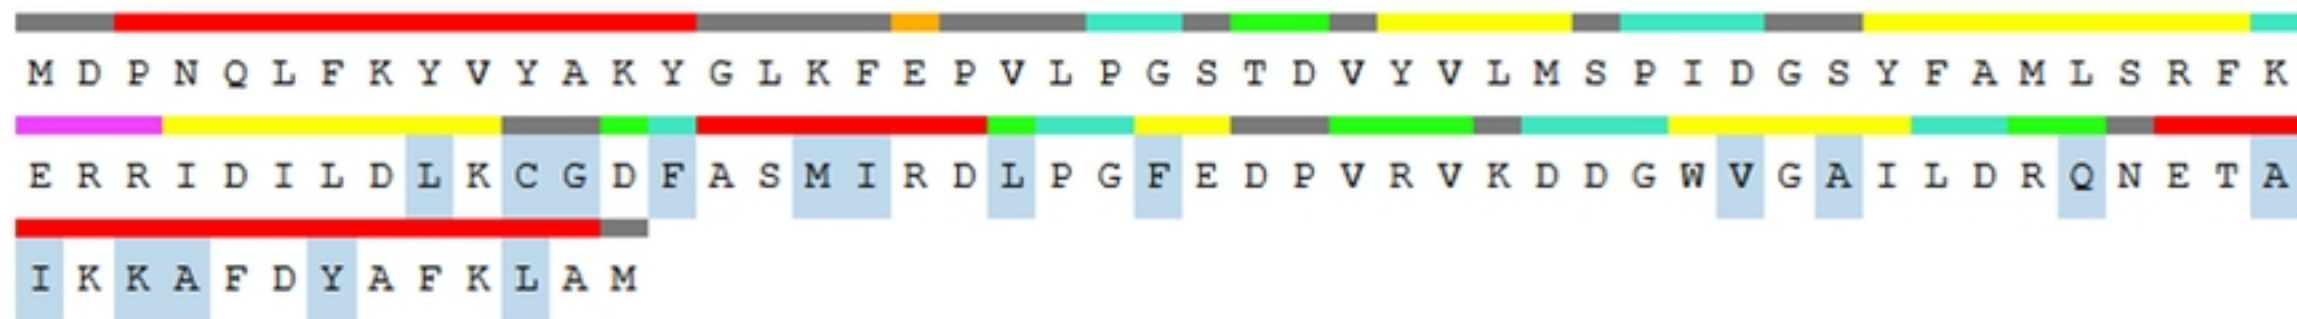

Fig9(b)

| Family                 | Description                                                                                                                                                                                                                 | Entry type | Clan | Envelope |     | Alignment |     | HMM      |            | HMM length | Bit score | E-value | Predicted active sites | Show/hide alignment  |
|------------------------|-----------------------------------------------------------------------------------------------------------------------------------------------------------------------------------------------------------------------------|------------|------|----------|-----|-----------|-----|----------|------------|------------|-----------|---------|------------------------|----------------------|
|                        |                                                                                                                                                                                                                             |            |      | Start    | End | Start     | End | From     | To         |            |           |         |                        |                      |
| <a href="#">TerB_N</a> | TerB N-terminal domain                                                                                                                                                                                                      | Domain     | n/a  | 137      | 365 | 141       | 360 | <b>5</b> | <b>204</b> | 209        | 159.5     | 8.8e-47 | n/a                    | <a href="#">Hide</a> |
| #HMM                   | twkvgleipgglyvygk...ereefidpalsvas.edgsdkevpfmsywpstsslsparrrtLdWlaqgRkg...pdtslsYvflYfygLerrwyvdnpqegyeklielp...eeldrllkeyydd.sfreyatelldlarllesdd...aylllpdpeeksakelpslrvalqyaad.....qepipaelalawaldpelk                  |            |      |          |     |           |     |          |            |            |           |         |                        |                      |
| #MATCH                 | +++ ++ ++++++e ++y+ +r ++f++++ +at ed+++ +++f++ +pY++++ +q+r+Y+ W++q Rkg +++s+Y+++Y+y+L+++gv+++q+gy+kli++ e+y ++ +l+++++dy fte++++l++ e + +y++l+dpe++sakel+ + + + ++ + +e + ++l ++w++l + k                                  |            |      |          |     |           |     |          |            |            |           |         |                        |                      |
| #PP                    | 566677778899*****..9999999999*****9999888888778*****99987666                                                                                                                                                                |            |      |          |     |           |     |          |            |            |           |         |                        |                      |
| #SEQ                   | NFKKKPLATDRIHQKQ--LYDYSVlpsvGRYKNFYNQKQKPYAdyEDDYSQYAAFRFRFYPTIEDMKIEQLRSYFAWRITQLRNQgyQKVSTSYAYVITYELNNIGVKSAGQGIQKLIIDFKENYvekfDLSTBPYLNWIKDYvLFYELDQKLIENFEDSIAQDhDYIVLHDPEFSFAKELAEVFAKTSYWNYSktikmSEVFAKVLRCVWQSLIISKQ |            |      |          |     |           |     |          |            |            |           |         |                        |                      |
| <a href="#">TerB_C</a> | TerB-C domain                                                                                                                                                                                                               | Domain     | n/a  | 464      | 600 | 467       | 599 | <b>5</b> | <b>150</b> | 151        | 76.2      | 3.2e-21 | n/a                    | <a href="#">Hide</a> |
| #HMM                   | eapekaeaakkisIDlsrlaairketaavsellaeifeeereeeeegakpertepeaeetaaladkvaesegLdaaeaalLraLlareswpreeveslarekglmpdvliesINekafdefddtvie..dddpeinedyleel                                                                             |            |      |          |     |           |     |          |            |            |           |         |                        |                      |
| #MATCH                 | +g + ++ +i++sls l+ ir ++++++L ++eet + +k+e++e++ e++ + +d+ ++ L+++e+ lL all++ + ++ + ++lm ++l++sINek+fdef+d vie + d+p+i+edy +l                                                                                               |            |      |          |     |           |     |          |            |            |           |         |                        |                      |
| #PP                    | 567777778899*****...****6...4444444444333333333333...379*****9...9999*****889*****9998                                                                                                                                      |            |      |          |     |           |     |          |            |            |           |         |                        |                      |
| #SEQ                   | NQQEKSRIURIQINLSNLEVIKNNASKTRDGLI--TDEE--ALEKEEYKQESSKIBSKVEITM--DIDLNKQSEIFLALLIQ--QFWQEVYKVEHLMDSILVDSINEKLFDEFGDSVIEfdEKDQPRIIEDYQTDG                                                                                    |            |      |          |     |           |     |          |            |            |           |         |                        |                      |

Fig3(b)
